# Supplementary material for: Photoinduced synthesis of functionalized spiro[2.3]hexane via an additive-free approach
Source: Royal Society of Chemistry journal article supplement (doi:10.1039/d5ob00055f), 2025-01-01

## Supporting information

### Photoinduced synthesis of functionalized spiro[2.3]hexane via additive-free

Dan Qi<sup>a,b</sup>, Jinrui Bai<sup>b</sup>, Yue Yao<sup>b</sup>, Chao Liu<sup>b,\*</sup>

<sup>1</sup> College of Physics and Optoelectronic Engineering, Shenzhen University, Shenzhen 518060, China.

<sup>2</sup> College of Chemistry and Environmental Engineering, Shenzhen University, Shenzhen 518060, China.

\*Corresponding author at: No. 3688, Nanshan Avenue, Nanshan District, Shenzhen 518060, PR China  
Email address: liuchao@szu.edu.cn / lwcp1981@163.com (C. Liu)

### Table of Contents

|                                                                            |            |
|----------------------------------------------------------------------------|------------|
| <b>I. General Information</b>                                              | <b>S2</b>  |
| <b>II. Synthesis of Starting Materials</b>                                 | <b>S3</b>  |
| <b>III. Reaction Optimization</b>                                          | <b>S4</b>  |
| <b>IV. General Procedure</b>                                               | <b>S6</b>  |
| <b>V. Mechanistic Study</b>                                                | <b>S8</b>  |
| <b>VI. Reference</b>                                                       | <b>S10</b> |
| <b>VII. Characterization Data of Products</b>                              | <b>S11</b> |
| <b>VIII. <sup>1</sup>H NMR and <sup>13</sup>C NMR Spectra for Products</b> | <b>S19</b> |

## General information

Unless otherwise noted, all commercially available compounds were used as provided without further purification. Solvents were dried and purified according to the procedure from "Purification of Laboratory Chemicals book". Column chromatography was performed using silica gel. Reactions were monitored by TLC and visualized by UV lamp (254 nm) and stained with ethanolic solution of concentrated potassium permanganate. Yields generally referred to chromatographically isolated yields, unless otherwise noted.  $^1\text{H}$  NMR (400 MHz),  $^{13}\text{C}$  NMR (101 MHz) and  $^{19}\text{F}$  NMR (376 MHz) spectra are recorded on a Bruker AV-400 spectrometer in  $\text{CDCl}_3$  with TMS as internal standard. For  $^1\text{H}$  NMR (400 MHz),  $\text{CDCl}_3$  ( $\delta = 7.26$  ppm) served as internal standard and data are reported as follows: chemical shift (in ppm), multiplicity (s = singlet, d = doublet, t = triplet, q = quartet, m = multiplet, brs = broad singlet), coupling constant (in Hz), and integration. GC-MS analysis was performed on 7890A-5975C/Agilent. HR-MS spectra were recorded on a Waters Xevo G2QTOF/UPLC mass spectrometer using TOF as the mass analyzer type. The photoreaction instrument (WPP-TEC-1020SL) was purchased from WATTCAS, China.

## SPECTROPHOTOCOLORMETER ANALYSIS REPORT

---

### Color Parameters:

CIE(1931:) x =0.1776 y =0.0296

CIE(1960:) u =0.2367 v =0.0592

CIE (1976:) u' =0.2367 v' =0.0888

**Color Temperature:**  $T_c=25000\text{K}$  Dominant Wave:  $\text{WL.D}=435.20\text{nm}$  Purity:  $\text{PUR}=93.54$

Peak Wave:  $\text{WL.P}=392.5\text{nm}$  Delta Wave:  $\text{WL.H}=18.0\text{nm}$

Color Tolerance:  $\text{SDCM}=186.7$   $\text{Ra:Ra}=15.0$

$\text{CRI1}=56.1$   $\text{CRI2}=16.3$   $\text{CRI3}=0.0$   $\text{CRI4}=0.0$   $\text{CRI5}=47.6$

$\text{CRI6}=0.0$   $\text{CRI7}=0.0$   $\text{CRI8}=0.0$   $\text{CRI9}=0.0$   $\text{CRI10}=0.0$

$\text{CRI11}=0.0$   $\text{CRI12}=0.0$   $\text{CRI13}=42.0$   $\text{CRI14}=6.3$   $\text{CRI15}=66.7$

### Photology Parameters:

Lum Flux:  $\Phi(\text{lm})=4.75\text{lm}$  Optical Power:  $\Phi_e(\text{mW})=2769.6\text{mW}$   $\eta(\text{lm/W})=0.4\text{lm/W}$

### Electric Parameters:

Forward Voltage:  $\text{VF} = 22.68$  V Forward Current:  $\text{IF} = 498.9$  mA Power = 11.32 W

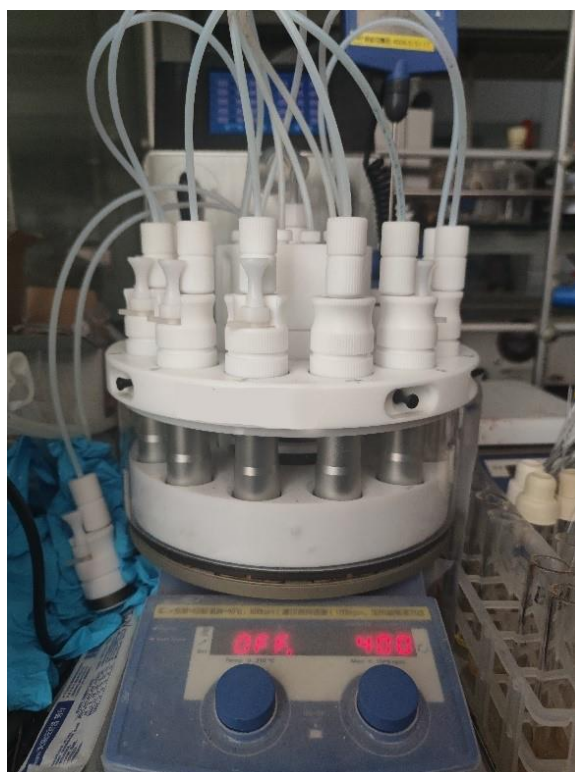

**Figure S1.** Photoreactor for photoreaction

### Important Safety Note

Handling of diazo compounds should only be done in a well-ventilated fume cupboard using an additional blast shield. No incidents occurred handling of diazoalkanes during the preparation of this manuscript, yet the reader should be aware of carcinogenicity and explosiveness of the herein described diazo compounds. General safety precautions when working with diazomethane and its derivatives should be followed. Any reactions described in this manuscript should not be performed without strict risk assessment and proper safety precautions.

### Synthesis of starting materials

#### Synthesis of diazoacetates 1a-1t'

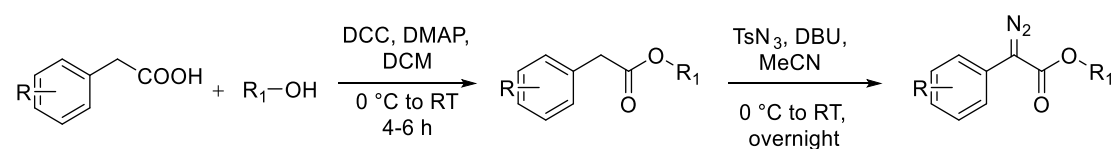

Step-I: To a stirred, ice cooled solution of the phenylacetic acid derivatives (10 mmol, 1 equiv.), and alcohol (12 mmol, 1.2 equiv.) in 200 mL DCM was added a solution of DCC (13 mmol, 1.3 equiv.) and DMAP (1 mmol, 0.1 equiv.) in 100 mL DCM at once. The solution was stirred 4-6 h while

slowly warming up to room temperature. After finishing the reaction, the solid was filtered off and washed with Et<sub>2</sub>O. The solvent was evaporated, and the residue was purified by silica gel column chromatography (pentane : ethyl acetate = 20:1) provided the desired ester.

Step-II: To a stirred, ice cooled solution of the ester (5 mmol, 1 equiv.) and p-Tosyl azide (5.5 mmol, 1.1 equiv.) in 100 mL MeCN were added DBU (7 mmol, 1.4 equiv.) dropwise. The solution was stirred over night while slowly warming up to room temperature. DCM was added, and the organic layer was washed two times with sat. aq. NH<sub>4</sub>Cl solution. The organic layer was dried over MgSO<sub>4</sub> and the solvent was removed in vacuum. The crude product was purified by silica gel column chromatography using (pentane : ethyl acetate = 10:1) provided the desired diazo compound as a orange oil.

The starting material 3-methylenecyclobutanecarbonitrile **2a** was purchased from Shanghai Aladdin Bio-Chem Technology Co., China.

## Reaction Optimization

**Table S1. Initial attempts on the photochemical cycloaddition reaction**

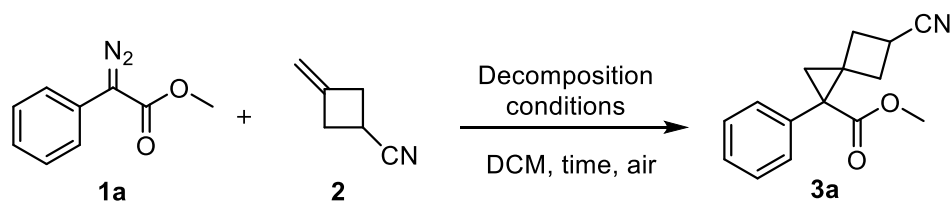

| Entry          | Decomposition conditions | Time(h) | Yield (%) |
|----------------|--------------------------|---------|-----------|
| 1              | dark                     | 8       | 0         |
| 2 <sup>c</sup> | 50 °C                    | 8       | 11        |
| 3              | 1W 465 nm blue LEDs      | 8       | 30        |
| 4              | 1W 465 nm blue LEDs      | 4       | 33        |
| 5              | 1W 465 nm blue LEDs      | 2       | 35        |
| 6              | 1W 465 nm blue LEDs      | 1       | 35        |

<sup>a</sup> Reaction conditions: **1a** (0.10 mmol, 1.0 equiv.), **2** (0.15 mmol, 1.5 equiv.), DCM (1.0 mL), under air.

**Table S2. Initial evaluations on the photochemical cycloaddition reaction conditions<sup>a</sup>**

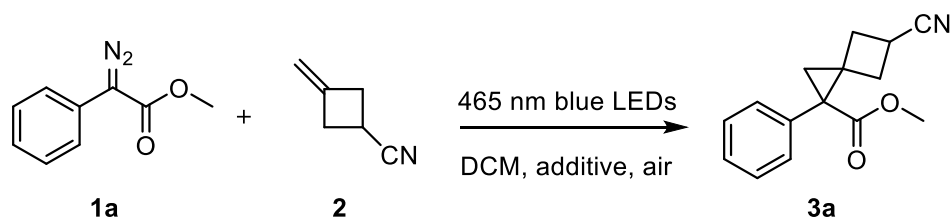

| Entry | Additive                        | Yield <sup>b</sup> (%) |
|-------|---------------------------------|------------------------|
| 1     | KH <sub>2</sub> PO <sub>4</sub> | 27                     |
| 2     | NH <sub>4</sub> Cl              | 32                     |
| 3     | Cu(OTf) <sub>2</sub>            | 15                     |
| 4     | K <sub>2</sub> HPO <sub>4</sub> | 31                     |
| 5     | NaHCO <sub>3</sub>              | 29                     |

<sup>a</sup> Reaction conditions: **1a** (0.10 mmol, 1.0 equiv.), **2** (0.15 mmol, 1.5 equiv.), DCM (1.0 mL), additive (0.2 mmol, 0.2 equiv.) 1 W 465 nm blue LEDs, 1 h, under air. <sup>b</sup> Isolated yield after column chromatography.

**Table S3. Optimization of reaction solvents<sup>a</sup>**

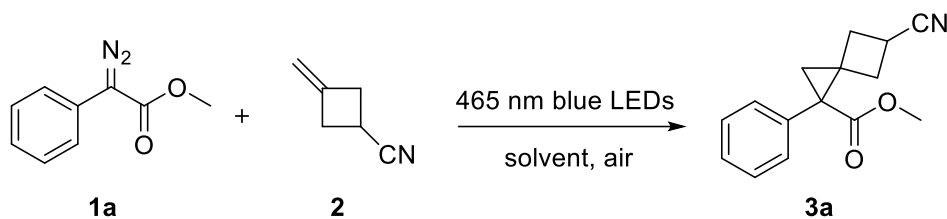

| Entry | Solvent     | Yield <sup>b</sup> (%) |
|-------|-------------|------------------------|
| 1     | DCM         | 35                     |
| 2     | DCE         | 29                     |
| 3     | EA          | 15                     |
| 4     | MeCN        | 13                     |
| 5     | ACE         | <5                     |
| 6     | THF         | N.D.                   |
| 7     | 1,4-Dioxane | N.D.                   |
| 8     | DMSO        | N.D.                   |
| 9     | DMF         | N.D.                   |

<sup>a</sup> Reaction conditions: **1a** (0.10 mmol, 1.0 equiv.), **2** (0.15 mmol, 1.5 equiv.), solvent (1.0 mL), 1 W 465 nm blue LEDs, 1 h, under air. <sup>b</sup> Isolated yield after column chromatography. N.D.: no detected.

**Table S4. Screening of reaction light intensity and atmospheres<sup>a</sup>**

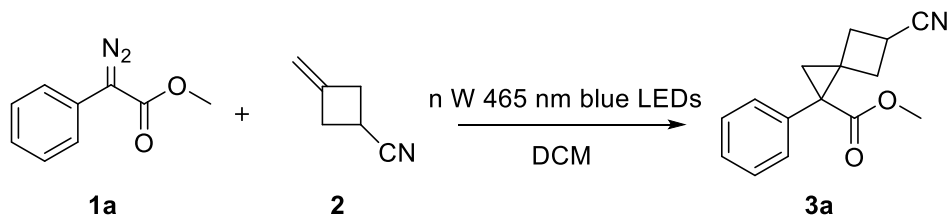

| Entry | Light intensity      | Atmosphere | Yield <sup>b</sup> (%) |
|-------|----------------------|------------|------------------------|
| 1     | 1 W 465 nm blue LEDs | air        | 35                     |
| 2     | 2 W 465 nm blue LEDs | air        | 40                     |
| 3     | 3 W 465 nm blue LEDs | air        | 48                     |
| 4     | 4 W 465 nm blue LEDs | air        | 54                     |

|    |                       |                |    |
|----|-----------------------|----------------|----|
| 5  | 5 W 465nm blue LEDs   | air            | 65 |
| 6  | 6 W 465 nm blue LEDs  | air            | 68 |
| 7  | 7 W 465 nm blue LEDs  | air            | 76 |
| 8  | 8 W 465 nm blue LEDs  | air            | 66 |
| 9  | 9 W 465 nm blue LEDs  | air            | 62 |
| 10 | 10 W 465 nm blue LEDs | air            | 55 |
| 11 | 7 W 465 nm blue LEDs  | N <sub>2</sub> | 76 |

<sup>a</sup> Reaction conditions: **1a** (0.10 mmol, 1.0 equiv.), **2** (0.15 mmol, 1.5 equiv.), DCM (1.0 mL), 1 h. <sup>b</sup> Isolated yield after column chromatography.

**Table S5 Screening of reaction substrates ratio <sup>a</sup>**

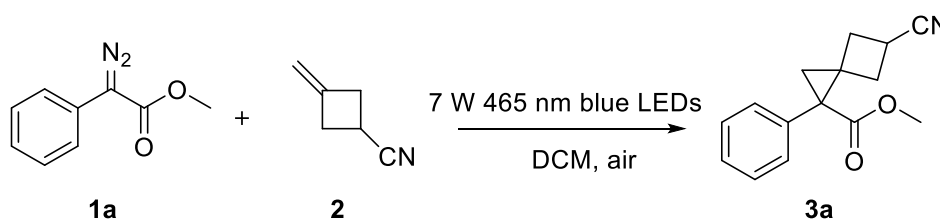

| Entry | <b>2</b>   | Yield <sup>b</sup> (%) |
|-------|------------|------------------------|
| 1     | 1.0 equiv. | 63                     |
| 2     | 1.5 equiv. | 77                     |
| 3     | 3.0 equiv. | 88                     |
| 4     | 4.0 equiv. | 93                     |
| 5     | 5.0 equiv. | 92                     |

<sup>a</sup> Reaction conditions: **3-a1**(1.0 equiv.), **2**, DCM (1.0 mL), 7 W 465 nm blue LEDs, 1 h, under air. <sup>b</sup> Isolated yield after column chromatography.

#### General procedure for the multicomponent synthesis of spiro[2.3]hexane

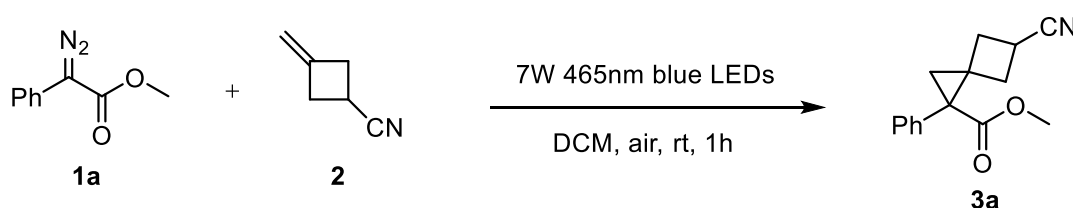

An oven dried 50 mL reaction vial was charged with a stir bar. Substrate **1a** (0.1 mmol, 1 eq), **2a** (1 mmol, 4 eq) was added with 1 mL DCM. The reaction mixture was stirred and irradiated with 7 W blue LEDs lamp (WATTCAS : WPTEC-1020SL) for 1 hours until the reaction was completed(monitored by TLC). After reaction, the solvent was removed by rotary evaporation. Purified by flash column chromatography on silica gel(petroleum ether: ethyl acetate = 10:1) afforded spiro[2.3]hexane as a colorless oil.  $R_f = 0.2$

#### General procedure for the gram-scale flow reaction

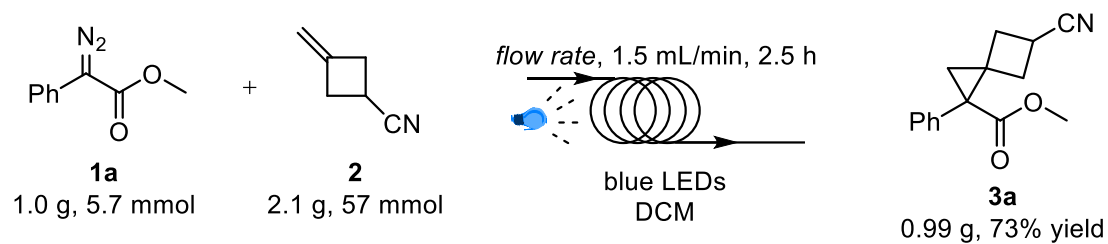

An oven dried 250 mL erlenmeyer flask was charged with a stir bar. Substrate **1a** (1.0 g, 5.7 mmol, 1 eq), **2a** (2.1 g, 57 mmol, 4 eq) was added with 100 mL DCM. The reaction mixture was stirred and irradiated with commercially available blue light bulbs and flow pump for 2.5 hours. After reaction, the solvent was removed by rotary evaporation. Purified by flash column chromatography on silica gel(petroleum ether: ethyl acetate = 10:1) afforded spiro[2.3]hexane(0.99g, 73% yield) as a colorless oil.  $R_f = 0.2$

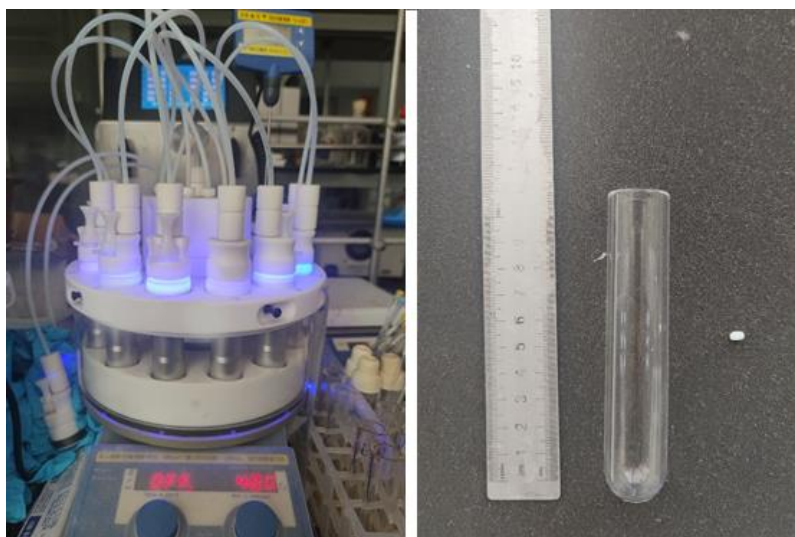

**Figure S2.** Reaction setup for general photoreactions

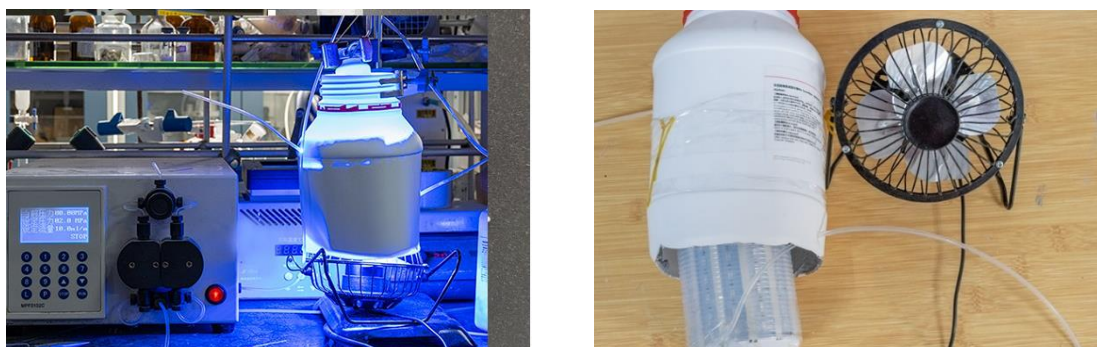

**Figure S3.** Flow reactor of photoreactions

### UV-vis absorbance spectra of diazoacetates 1

Before the quenching experiments, the emission spectrum of methyl 2-diazo-2-phenylacetate (0.002 mM in DCM, 1 mL) was measured after added 2 mL DCM to serve as the background experiment, in which the emission maximum  $\lambda_{\text{max}}$  was determined at 432 nm (Figure S4).

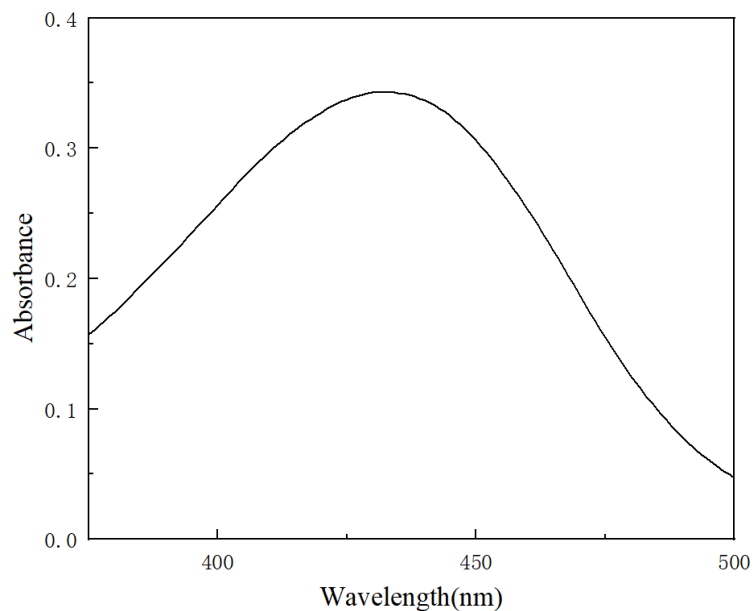

**Figure S4.** Emission spectrum of methyl 2-diazo-2-phenylacetate. Concentration =  $6.67 \times 10^{-4}$  mM (0.002/3 mM)

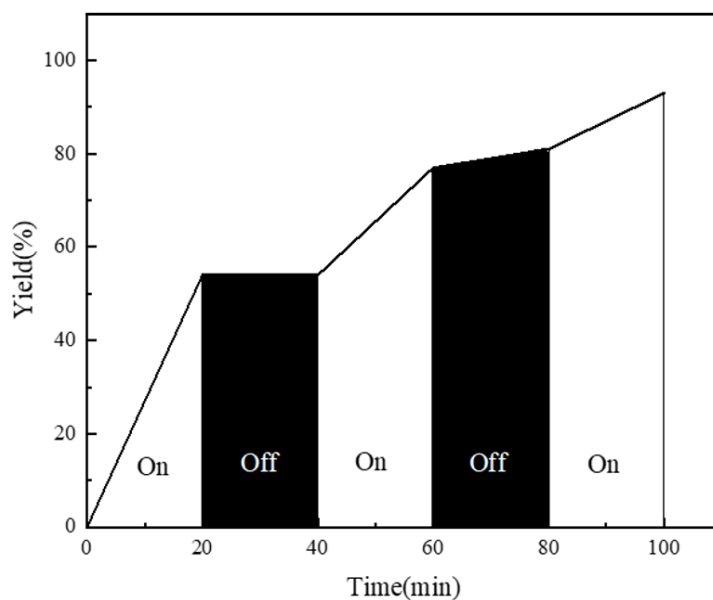

**Figure S5.** On/off light irradiation experiments

### Control experiments



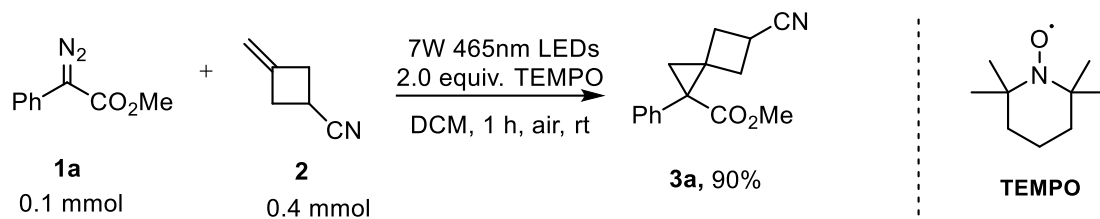

An oven dried 50 mL reaction vial was charged with a stir bar. Substrate **1a** (0.1 mmol, 1 eq), **2a** (1 mmol, 4 eq), TEMPO (0.5 mmol, 2 eq) was added with 1 mL dcm. The reaction mixture was stirred and irradiated with 7 W blue LEDs lamp (WATTCAS: WPTEC-1020SL) for 1 hours until the reaction was completed(monitored by TLC). After reaction, the solvent was removed by rotary evaporation. Purified by flash column chromatography on silica gel (petroleum ether: ethyl acetate = 10:1) afforded vinyloxetane(90% yield) as a colorless oil.

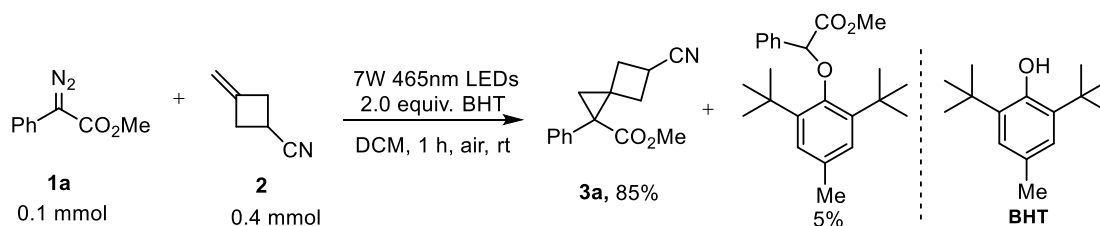

An oven dried 50 mL reaction vial was charged with a stir bar. Substrate **1a** (0.1 mmol, 1 eq), **2a** (1 mmol, 4 eq), BHT (0.5 mmol, 2 eq) was added with 1 mL DCM. The reaction mixture was stirred and irradiated with 7 W blue LEDs lamp (WATTCAS: WPTEC-1020SL) for 1 hours until the reaction was completed(monitored by TLC). After reaction, the solvent was removed by rotary evaporation. Purified by flash column chromatography on silica gel (petroleum ether: ethyl acetate = 10:1) afforded vinyloxetane (85% yield) as a colorless oil.

### On/off light irradiation experiments

An oven dried 50 mL reaction vial was charged with a stir bar. Substrate **1a** (0.1 mmol, 1 eq), **2a** (1 mmol, 4 eq) was added with 1 mL DCM. The reaction mixture was stirred and irradiated with 7 W blue LEDs lamp (WATTCAS : WPTEC-1020SL) for 1 hours until the reaction was completed(monitored by TLC). After reaction, the solvent was removed by rotary evaporation. Purified by flash column chromatography on silica gel(petroleum ether: ethyl acetate = 10:1) afforded spiro[2.3]hexane as a colorless oil.  $R_f = 0.2$

### DFT Calculations

The calculations were performed using DFT implemented in the Dmol<sup>3</sup> package. The exchange correlation effects were accounted for by using the GGA-PBE function employed for the exchanged-correlation functional together with the double-numerical quality basis set with polarisation functions (DNP with 3.5 basis file) <sup>[1,2]</sup>. A global orbital cut off of 3.7 Å was adopted to improve the computational performance. Grimme's semi-empirical DFT-D scheme for dispersion

correction was adopted to describe the van der Waals interactions. The tolerances of the energy, gradient, and displacement convergence were  $10^{-5}$  hartree (1 hartree = 27.2114 eV), 0.002 hartree per Å, and 0.005 Å, respectively. The SCF tolerance was set as  $10^{-6}$ . To better simulate the reaction in real solvent solutions, a conductor-like screening model (COSMO) with a dielectric constant of 4.806 was adopted for all systems<sup>[3]</sup>.

[1] B. Delley, J. Chem. Phys. 92, 508 (1990).

[2] B. Delley, J. Chem. Phys. 113, 7756 (2000).

[3] A. Klamt, G. Schuurmann, COSMO: a new approach to dielectric screening in solvents with explicit expressions for the screening energy and its gradient, J Chem Soc Pakistan 2 (1993) 799.

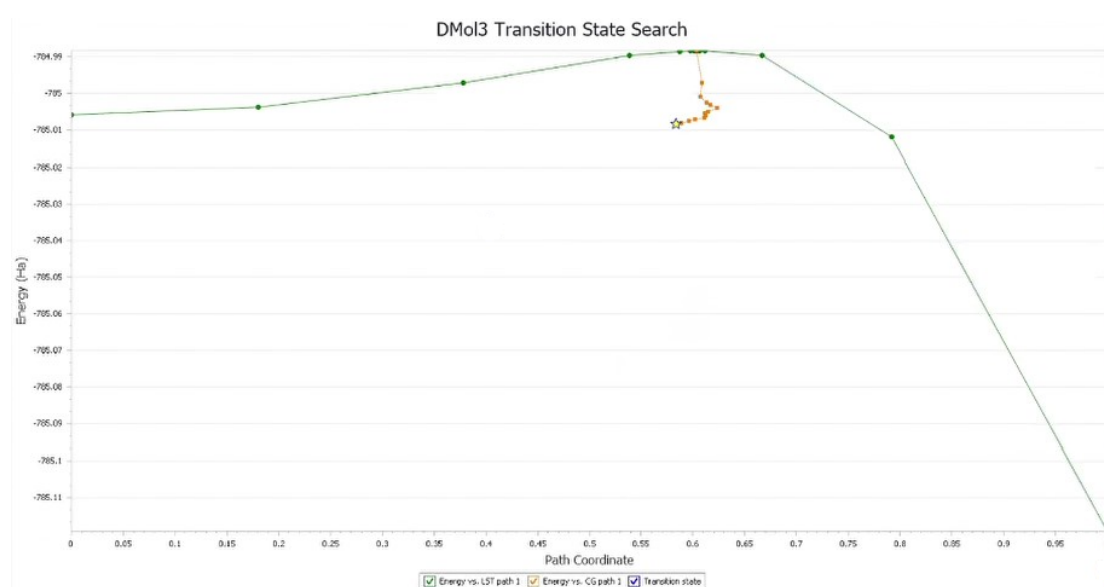

**Figure S5. DMol<sup>3</sup> Transition State Search**

The multiple attempts to search for the critical transition state in the Dmol<sup>3</sup> package revealed a tiny energy barrier during the process of forming the transition state. The transition state was stabilized at an energy lower than the starting substrate, providing evidence that the reaction occurred spontaneously.

| Entry | Energy kcal/mol | $\Delta G$ kcal/mol |
|-------|-----------------|---------------------|
| 1     | -180220.0487    |                     |
| 2a    | -312269.5436    |                     |
| TS1   | -492,483.9516   | 5.64070651          |

|    |              |              |
|----|--------------|--------------|
| 3a | -492543.5349 | -53.94262712 |
| 3b | -492544.0654 | -54.47305564 |

## Characterization Data of Products

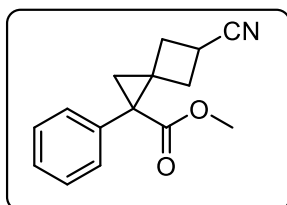

**Compound 3a:** colorless oil, d.r.=1.9:1, 22.5 mg. **major:**  $^1\text{H NMR}$  (400 MHz,  $\text{CDCl}_3$ )  $\delta$  7.43 - 7.37 (m, 4H), 7.34 - 7.31 (m, 4H), 7.29 - 7.26 (m, 2H), 3.68 (s, 5H), 3.30 - 3.13 (m, 3H), 2.89 - 2.73 (m, 4H), 2.49 (dd,  $J = 12.5, 7.8$  Hz, 2H), 2.08 - 1.99 (m, 2H), 1.89 (d,  $J = 5.0$  Hz, 2H), 1.53 (d,  $J = 5.0$  Hz, 2H).  $^{13}\text{C NMR}$  (101 MHz,  $\text{CDCl}_3$ )  $\delta$  172.20, 135.29, 130.73, 128.49, 127.64, 122.28, 52.49, 36.72, 34.19, 32.87, 32.26, 26.47, 16.85. **minor:**  $^1\text{H NMR}$  (400 MHz,  $\text{CDCl}_3$ )  $\delta$  7.43 - 7.37 (m, 2H), 7.34 - 7.31 (m, 3H), 3.67 (s, 3H), 3.30 - 3.13 (m, 1H), 2.89 - 2.73 (m, 2H), 2.36 (dd,  $J = 12.7, 9.5$  Hz, 1H), 2.15 (dd,  $J = 12.7, 6.1$  Hz, 1H), 1.95 (d,  $J = 5.3$  Hz, 1H), 1.58 (d,  $J = 5.3$  Hz, 1H).  $^{13}\text{C NMR}$  (101 MHz,  $\text{CDCl}_3$ )  $\delta$  172.20, 135.37, 130.68, 128.49, 127.64, 122.61, 52.42, 36.89, 33.44, 32.80, 32.31, 26.10, 17.43. **HRMS (ESI) m/z:**  $\text{C}_{15}\text{H}_{16}\text{NO}_2^+$   $[\text{M}+\text{H}]^+$  242.1176, found 242.1179.

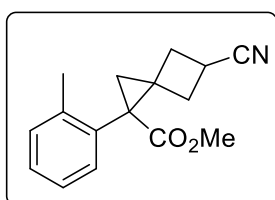

**Compound 3b:** colorless oil, d.r.=1.5:1, 18.9 mg. **major:**  $^1\text{H NMR}$  (400 MHz,  $\text{CDCl}_3$ )  $\delta$  7.29 - 7.23 (m, 3H), 7.20 (ddd,  $J = 8.7, 6.0, 2.0$  Hz, 2H), 7.14 (dd,  $J = 7.7, 3.2$  Hz, 2H), 3.66 (s, 5H), 3.28 (p,  $J = 8.7$  Hz, 2H), 3.02 (ddd,  $J = 13.9, 9.0, 6.0$  Hz, 2H), 2.85 (ddd,  $J = 12.8, 6.6, 2.4$  Hz, 2H), 2.41 (s, 5H), 2.40 - 2.34 (m, 2H), 2.01 (td,  $J = 10.5, 10.0, 5.0$  Hz, 2H), 1.85 (d,  $J = 4.8$  Hz, 1H), 1.53 (d,  $J = 4.8$  Hz, 2H).  $^{13}\text{C NMR}$  (101 MHz,  $\text{CDCl}_3$ )  $\delta$  172.45, 139.01, 134.11, 130.55, 129.73, 127.83, 126.07, 122.17, 52.35, 35.50, 34.47, 33.13, 32.37, 28.20, 19.82, 16.60. **minor:**  $^1\text{H NMR}$  (400 MHz,  $\text{CDCl}_3$ )  $\delta$  7.29 - 7.23 (m, 2H), 7.20 (ddd,  $J = 8.7, 6.0, 2.0$  Hz, 1H), 7.14 (dd,  $J = 7.7, 3.2$  Hz, 1H), 3.65 (s, 3H), 3.23 - 3.14 (m, 1H), 3.02 (ddd,  $J = 13.9, 9.0, 6.0$  Hz, 1H), 2.85 (ddd,  $J = 12.8, 6.6, 2.4$  Hz, 1H), 2.32 (s, 3H), 2.26 (d,  $J = 10.8$  Hz, 1H), 2.12 (dd,  $J = 12.9, 5.8$  Hz, 1H), 1.92 (d,  $J = 5.1$  Hz, 1H), 1.59 (d,  $J = 5.1$  Hz, 1H).  $^{13}\text{C NMR}$  (101 MHz,  $\text{CDCl}_3$ )  $\delta$  172.45, 138.78, 134.16, 130.38, 130.03, 127.83, 126.19, 122.78, 52.32, 35.55, 33.39, 32.48, 32.01, 28.23, 19.56, 17.50. **HRMS (ESI) m/z:**  $\text{C}_{16}\text{H}_{18}\text{NO}_2^+$   $[\text{M}+\text{H}]^+$  256.1332, found 256.1334.

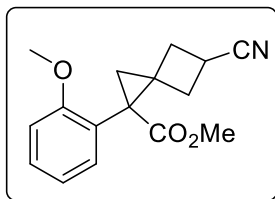

**Compound 3c:** light yellow oil, d.r.=1.3:1, 21.5 mg. **major:**  $^1\text{H NMR}$  (400

MHz,  $\text{CDCl}_3$ )  $\delta$  7.36 - 7.31 (m, 1H), 7.09 (ddd,  $J = 7.4, 4.7, 1.8$  Hz, 1H), 7.00 - 6.93 (m, 3H), 3.98 (s, 4H), 3.63 (s, 4H), 3.27 - 3.13 (m, 1H), 3.03 - 2.93 (m, 1H), 2.86 - 2.78 (m, 1H), 2.21 (m, 1H), 2.07 - 1.98 (m, 1H), 1.74 (d,  $J = 5.0$  Hz, 1H), 1.44 (dd,  $J = 5.2, 3.1$  Hz, 1H).  $^{13}\text{C NMR}$  (101 MHz,  $\text{CDCl}_3$ )  $\delta$  172.6, 159.0, 130.1, 129.2, 124.6, 122.8, 120.5, 110.5, 55.7, 52.1, 33.6, 32.6, 32.3, 27.0, 16.4. **minor:**  $^1\text{H NMR}$  (400 MHz,  $\text{CDCl}_3$ )  $\delta$  7.36 - 7.31 (m, 1H), 7.09 (ddd,  $J = 7.4, 4.7, 1.8$  Hz, 1H), 7.00 - 6.93 (m, 2H), 3.90 (s, 3H), 3.62 (s, 3H), 3.27 - 3.13 (m, 1H), 3.03 - 2.93 (m, 1H), 2.86 - 2.78 (m, 1H), 2.21 (m, 1H), 2.07 - 1.98 (m, 1H), 1.76 (d,  $J = 5.3$  Hz, 1H), 1.44 (dd,  $J = 5.2, 3.1$  Hz, 1H).  $^{13}\text{C NMR}$  (101 MHz,  $\text{CDCl}_3$ )  $\delta$  172.6, 159.0, 130.5, 124.9, 123.0, 120.9, 110.6, 55.6, 52.1, 33.4, 32.8, 31.4, 26.2, 17.7. **HRMS (ESI) m/z:**  $[\text{M} + \text{H}]^+$  Calcd for  $\text{C}_{16}\text{H}_{18}\text{O}_3\text{N}$ : 272.1281; Found: 272.1279.

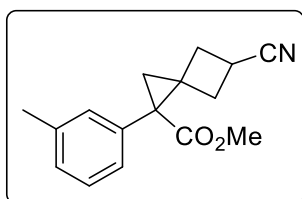

**Compound 3d:** colorless oil, d.r.=1.4:1, 19.5 mg. **major:**  $^1\text{H NMR}$

(400 MHz,  $\text{CDCl}_3$ )  $\delta$  7.31 - 7.25 (m, 3H), 7.14 (d,  $J = 7.1$  Hz, 3H), 3.67 (s, 4H), 3.29 - 3.21 (m, 1H), 2.88 - 2.70 (m, 3H), 2.50 (dd,  $J = 12.5, 7.9$  Hz, 1H), 2.40 (s, 4H), 2.07 - 1.98 (m, 2H), 1.86 (d,  $J = 4.9$  Hz, 1H), 1.52 (d,  $J = 5.0$  Hz, 1H).  $^{13}\text{C NMR}$  (101 MHz,  $\text{CDCl}_3$ )  $\delta$  172.31, 138.09, 135.19, 131.33, 128.43, 127.81, 122.30, 52.45, 36.61, 34.27, 32.97, 32.33, 26.54, 21.51, 16.84. **minor:**  $^1\text{H NMR}$  (400 MHz,  $\text{CDCl}_3$ )  $\delta$  7.14 (d,  $J = 7.1$  Hz, 3H), 7.08 (dt,  $J = 4.1, 1.7$  Hz, 2H), 3.66 (s, 3H), 3.21 - 3.14 (m, 1H), 2.88 - 2.70 (m, 2H), 2.39 (s, 3H), 2.36 (d,  $J = 9.6$  Hz, 1H), 2.15 (dd,  $J = 12.8, 6.1$  Hz, 1H), 1.92 (d,  $J = 5.2$  Hz, 1H), 1.57 (d,  $J = 5.3$  Hz, 1H).  $^{13}\text{C NMR}$  (101 MHz,  $\text{CDCl}_3$ )  $\delta$  172.31, 138.09, 135.26, 131.27, 128.33, 128.31, 122.66, 52.38, 36.81, 33.48, 32.71, 32.25, 26.17, 21.51, 17.41. **HRMS (ESI) m/z:**  $[\text{M} + \text{H}]^+$  Calcd for  $\text{C}_{16}\text{H}_{18}\text{O}_2\text{N}$ : 256.1332; Found: 256.1334.

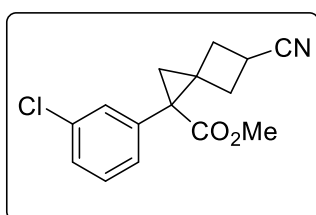

**Compound 3e:** yellow oil, d.r.=1:1, 22.6 mg. **major:**  $^1\text{H NMR}$  (400

MHz,  $\text{CDCl}_3$ )  $\delta$  7.35 - 7.25 (m, 4H), 3.68 (s, 3H), 3.30 - 3.22 (m, 1H), 2.87 - 2.72 (m, 2H), 2.46

(dd,  $J = 12.5, 7.9$  Hz, 1H), 2.04 (ddd,  $J = 12.0, 9.0, 2.5$  Hz, 1H), 1.89 (d,  $J = 5.1$  Hz, 1H), 1.51 (d,  $J = 5.1$  Hz, 1H).  $^{13}\text{C}$  NMR (101 MHz,  $\text{CDCl}_3$ )  $\delta$  171.55, 137.35, 134.23, 130.61, 129.72, 129.20, 122.45, 52.57, 36.34, 34.17, 32.94, 32.86, 26.42, 16.89. **minor:**  $^1\text{H}$  NMR (400 MHz,  $\text{CDCl}_3$ )  $\delta$  7.35 – 7.25 (m, 3H), 7.18 – 7.13 (m, 1H), 3.67 (s, 3H), 3.22 – 3.14 (m, 1H), 2.87 – 2.72 (m, 2H), 2.36 (dd,  $J = 12.8, 9.5$  Hz, 1H), 2.15 (dd,  $J = 12.8, 6.0$  Hz, 1H), 1.96 (d,  $J = 5.4$  Hz, 1H), 1.57 (d,  $J = 5.4$  Hz, 1H).  $^{13}\text{C}$  NMR (101 MHz,  $\text{CDCl}_3$ )  $\delta$  171.55, 137.44, 134.23, 130.80, 128.92, 127.91, 122.07, 52.51, 36.52, 33.39, 32.48, 32.21, 26.15, 17.42. **HRMS (ESI) m/z:**  $[\text{M} + \text{H}]^+$  Calcd for  $\text{C}_{15}\text{H}_{15}\text{O}_2\text{NCl}$ : 276.0786; Found: 276.0783.

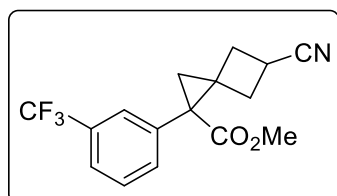

**Compound 3f:** yellow oil, d.r.=1.1:1, 24.8 mg. **major:**  $^1\text{H}$  NMR

(400 MHz,  $\text{CDCl}_3$ )  $\delta$  7.58 (dd,  $J = 7.7, 1.9$  Hz, 2H), 7.53 (d,  $J = 6.7$  Hz, 2H), 7.51 – 7.45 (m, 1H), 3.66 (s, 3H), 3.20 (ddd,  $J = 9.4, 6.0, 3.4$  Hz, 1H), 2.80 – 2.73 (m, 2H), 2.13 (dd,  $J = 12.8, 5.9$  Hz, 1H), 2.08 – 2.02 (m, 1H), 1.94 (d,  $J = 5.2$  Hz, 1H), 1.55 (d,  $J = 5.2$  Hz, 1H).  $^{13}\text{C}$  NMR (101 MHz,  $\text{CDCl}_3$ )  $\delta$  171.41, 136.52, 134.22, 130.88 (q,  $J = 34.0, 33.1$  Hz), 128.98, 127.36 (q,  $J = 3.5$  Hz), 124.53 (q,  $J = 3.4$  Hz), 122.39, 52.49, 36.57, 33.40, 32.95, 32.17, 26.11, 17.40. **minor:**  $^1\text{H}$  NMR (400 MHz,  $\text{CDCl}_3$ )  $\delta$  7.58 (dd,  $J = 7.7, 1.9$  Hz, 2H), 7.53 (d,  $J = 6.7$  Hz, 2H), 7.51 – 7.45 (m, 1H), 3.67 (s, 3H), 3.30 – 3.22 (m, 1H), 2.85 (dd,  $J = 12.8, 8.2$  Hz, 2H), 2.41 (dd,  $J = 12.5, 7.8$  Hz, 1H), 2.32 (dd,  $J = 12.8, 9.5$  Hz, 1H), 2.01 (d,  $J = 5.4$  Hz, 1H), 1.61 (d,  $J = 5.5$  Hz, 1H).  $^{13}\text{C}$  NMR (101 MHz,  $\text{CDCl}_3$ )  $\delta$  171.41, 136.45, 134.58, 130.88 (q,  $J = 34.0, 33.1$  Hz), 127.07 (q,  $J = 3.5$  Hz), 124.53 (q,  $J = 3.4$  Hz), 122.01, 52.56, 36.43, 34.15, 32.85, 32.52, 26.27, 16.92. **HRMS (ESI) m/z:**  $[\text{M} + \text{H}]^+$  Calcd for  $\text{C}_{16}\text{H}_{15}\text{O}_2\text{F}_3\text{N}$ : 310.1049; Found: 310.1056.

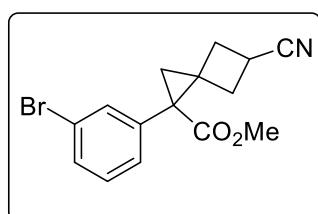

**Compound 3g:** light yellow oil, d.r.=1.1:1, 24 mg. **major:**  $^1\text{H}$  NMR

(400 MHz,  $\text{CDCl}_3$ )  $\delta$  7.44 (ddt,  $J = 10.1, 8.4, 1.8$  Hz, 2H), 7.32 – 7.19 (m, 2H), 3.67 (s, 4H), 3.29 – 3.22 (m, 1H), 2.86 – 2.70 (m, 2H), 2.46 (dd,  $J = 12.4, 7.9$  Hz, 1H), 2.08 – 2.00 (m, 1H), 1.89 (d,  $J = 5.1$  Hz, 1H), 1.51 (d,  $J = 5.1$  Hz, 1H).  $^{13}\text{C}$  NMR (101 MHz,  $\text{CDCl}_3$ )  $\delta$  171.53, 137.64, 133.46, 130.01, 129.72, 122.39, 122.07, 52.58, 36.31, 34.17, 32.87, 32.50, 26.42, 16.90. **minor:**  $^1\text{H}$  NMR (400 MHz,  $\text{CDCl}_3$ )  $\delta$  7.44 (ddt,  $J = 10.1, 8.4, 1.8$  Hz, 2H), 7.32 – 7.19 (m, 2H), 3.66 (s, 3H), 3.21 – 3.14 (m, 1H), 2.86 – 2.70 (m, 2H), 2.36 (dd,  $J = 12.7, 9.5$  Hz, 1H), 2.15 (ddd,  $J = 12.7, 6.0, 1.3$  Hz, 1H), 1.95 (d,  $J = 5.4$  Hz, 1H), 1.56 (d,  $J = 5.4$  Hz, 1H).  $^{13}\text{C}$  NMR (101 MHz,  $\text{CDCl}_3$ )  $\delta$  171.53, 137.72, 133.67, 130.82, 129.43, 122.45, 122.39, 52.52, 36.48, 33.39, 32.95, 32.21, 26.17, 17.42. **HRMS (ESI) m/z:**  $[\text{M} + \text{H}]^+$  Calcd for  $\text{C}_{15}\text{H}_{15}\text{O}_2\text{NBr}$ : 320.0280; Found: 320.0284.

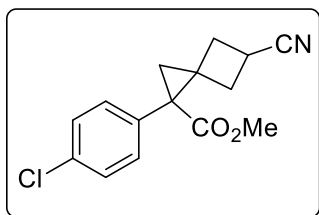

**Compound 3h:** yellow oil, d.r.=1.3:1, 24.8 mg. **major:**  $^1\text{H NMR}$  (400 MHz,  $\text{CDCl}_3$ )  $\delta$  7.36 (ddd,  $J = 8.6, 5.1, 1.5$  Hz, 3H), 7.29 – 7.25 (m, 3H), 7.23 – 7.19 (m, 3H), 3.67 (s, 4H), 3.29 – 3.21 (m, 1H), 2.86 – 2.74 (m, 3H), 2.43 (dd,  $J = 12.5, 7.7$  Hz, 1H), 2.08 – 2.01 (m, 1H), 1.89 (d,  $J = 5.1$  Hz, 1H), 1.48 (d,  $J = 5.1$  Hz, 1H).  $^{13}\text{C NMR}$  (101 MHz,  $\text{CDCl}_3$ )  $\delta$  171.70, 133.87, 133.55, 132.08, 128.72, 122.15, 52.53, 36.13, 34.08, 32.80, 32.43, 26.40, 16.90. **minor:**  $^1\text{H NMR}$  (400 MHz,  $\text{CDCl}_3$ )  $\delta$  7.36 (ddd,  $J = 8.6, 5.1, 1.5$  Hz, 2H), 7.23 – 7.19 (m, 2H), 3.66 (s, 3H), 3.20 – 3.13 (m, 1H), 2.86 – 2.74 (m, 2H), 2.34 (dd,  $J = 11.5, 9.6$  Hz, 1H), 2.13 (dd,  $J = 12.8, 6.0$  Hz, 1H), 1.95 (d,  $J = 5.4$  Hz, 1H), 1.54 (d,  $J = 5.4$  Hz, 1H).  $^{13}\text{C NMR}$  (101 MHz,  $\text{CDCl}_3$ )  $\delta$  171.70, 133.95, 133.87, 132.02, 128.72, 122.46, 52.46, 36.24, 33.39, 32.89, 32.19, 26.17, 17.41. **HRMS (ESI) m/z:**  $[\text{M} + \text{H}]^+$  Calcd for  $\text{C}_{15}\text{H}_{15}\text{O}_2\text{NCl}$ : 276.0786; Found: 276.0783.

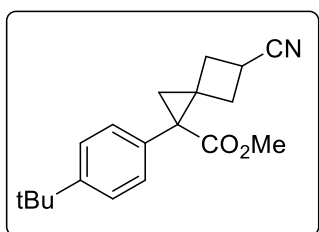

**Compound 3i:** colorless oil, d.r.=1.6:1, 23.3 mg. **major:**  $^1\text{H NMR}$  (400 MHz,  $\text{CDCl}_3$ )  $\delta$  7.42 - 7.36 (m, 3H), 7.27 - 7.23 (m, 3H), 3.67 (s, 5H), 3.21 (m, 2H), 2.86 - 2.71 (m, 3H), 2.49 (dd,  $J = 12.5, 7.8$  Hz, 2H), 2.04 (tt,  $J = 9.3, 1.6$  Hz, 2H), 1.86 (d,  $J = 4.9$  Hz, 2H), 1.51 (d,  $J = 4.9$  Hz, 2H), 1.35 (s, 15H).  $^{13}\text{C NMR}$  (101 MHz,  $\text{CDCl}_3$ )  $\delta$  172.4, 150.3, 132.1, 130.3, 125.4, 122.4, 52.4, 36.4, 34.2, 33.4, 32.3, 31.4, 26.3, 16.8. **minor:**  $^1\text{H NMR}$  (400 MHz,  $\text{CDCl}_3$ )  $\delta$  7.42 - 7.36 (m, 2H), 7.21 - 7.17 (m, 2H), 3.66 (s, 3H), 3.21 (m, 1H), 2.86 - 2.71 (m, 2H), 2.36 (dd,  $J = 12.7, 9.5$  Hz, 1H), 2.16 (dd,  $J = 12.7, 6.3$  Hz, 1H), 1.92 (d,  $J = 5.3$  Hz, 1H), 1.55 (d,  $J = 5.3$  Hz, 1H), 1.35 (s, 9H).  $^{13}\text{C NMR}$  (101 MHz,  $\text{CDCl}_3$ )  $\delta$  172.4, 150.4, 132.2, 130.2, 125.4, 122.7, 52.4, 36.5, 34.6, 32.9, 32.8, 31.4, 25.9, 17.4. **HRMS (ESI) m/z:**  $[\text{M} + \text{H}]^+$  Calcd for  $\text{C}_{19}\text{H}_{24}\text{O}_2\text{N}$ : 298.1802; Found: 298.1806.

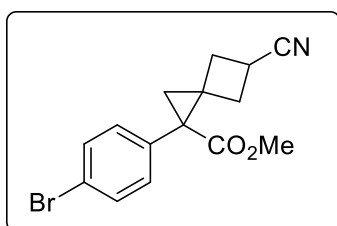

**Compound 3j:** yellow oil, d.r.=1.3:1, 26.9 mg. **major:**  $^1\text{H NMR}$  (400 MHz,  $\text{CDCl}_3$ )  $\delta$  7.51 (ddd,  $J = 8.7, 5.1, 1.9$  Hz, 2H), 7.21 (dd,  $J = 8.4, 1.9$  Hz, 2H), 3.67 (s, 4H), 3.30 - 3.13 (m, 1H), 2.78 (qd,  $J = 12.7, 5.8$  Hz, 3H), 2.43 (dd,  $J = 12.5, 7.7$  Hz, 1H), 2.04 (dd,  $J = 12.2, 9.3$  Hz, 1H), 1.89 (d,  $J = 3.5$  Hz, 1H), 1.48 (d,  $J = 3.5$  Hz, 1H).  $^{13}\text{C NMR}$  (101 MHz,  $\text{CDCl}_3$ )  $\delta$  171.6, 134.4, 132.4, 131.7, 122.1, 121.8, 52.6, 36.2, 34.1, 32.8, 32.4, 26.4, 16.9. **minor:**  $^1\text{H NMR}$  (400 MHz,  $\text{CDCl}_3$ )  $\delta$  7.51 (ddd,  $J = 8.7, 5.1, 1.9$  Hz, 2H), 7.15 (dd,  $J = 8.5, 1.9$  Hz, 2H), 3.66 (s, 3H), 3.30 - 3.13 (m, 1H), 2.78 (qd,  $J = 12.7, 5.8$  Hz, 2H), 2.34 (dd,  $J = 12.8, 9.6$  Hz, 1H), 2.13 (dd,  $J = 12.7, 5.3$  Hz, 1H), 1.95 (d,  $J = 3.7$  Hz, 1H), 1.54 (d,  $J = 3.8$  Hz, 1H).  $^{13}\text{C NMR}$  (101 MHz,  $\text{CDCl}_3$ )  $\delta$  171.6, 134.5, 132.4, 131.7, 122.5, 121.7, 52.5, 36.3, 33.4, 32.9, 32.2, 26.1, 17.4. **HRMS (ESI) m/z:**  $[\text{M} + \text{H}]^+$  Calcd for  $\text{C}_{15}\text{H}_{15}\text{O}_2\text{NBr}$ : 320.0281; Found: 320.0285.

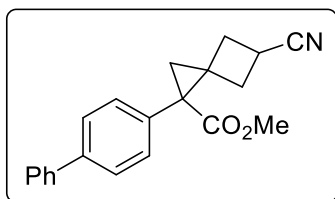

**Compound 3k:** brown oil, d.r.=1.4:1, 28.9 mg. **major:**  $^1\text{H}$  NMR

(400 MHz,  $\text{CDCl}_3$ )  $\delta$  7.66 – 7.60 (m, 6H), 7.49 (t,  $J$  = 7.6 Hz, 3H), 7.46 – 7.37 (m, 3H), 7.40 – 7.32 (m, 1H), 3.71 (s, 4H), 3.23 – 3.17 (m, 1H), 2.91 – 2.75 (m, 3H), 2.54 (dd,  $J$  = 12.5, 7.8 Hz, 1H), 2.11 – 2.05 (m, 1H), 1.93 (d,  $J$  = 5.0 Hz, 1H), 1.57 (d,  $J$  = 5.0 Hz, 1H).  $^{13}\text{C}$  NMR (101 MHz,  $\text{CDCl}_3$ )  $\delta$  172.15, 140.59, 140.42, 134.34, 131.12, 128.87, 127.48, 127.20, 122.30, 52.52, 36.47, 34.22, 32.95, 32.93, 26.47, 16.90. **minor:**  $^1\text{H}$  NMR (400 MHz,  $\text{CDCl}_3$ )  $\delta$  7.66 – 7.60 (m, 4H), 7.49 (t,  $J$  = 7.6 Hz, 2H), 7.46 – 7.37 (m, 2H), 7.40 – 7.32 (m, 1H), 3.70 (s, 3H), 3.31 – 3.23 (m, 1H), 2.91 – 2.75 (m, 2H), 2.42 (dd,  $J$  = 12.6, 9.6 Hz, 1H), 2.19 (dd,  $J$  = 12.5, 5.8 Hz, 1H), 1.99 (d,  $J$  = 5.3 Hz, 1H), 1.63 (d,  $J$  = 5.3 Hz, 1H).  $^{13}\text{C}$  NMR (101 MHz,  $\text{CDCl}_3$ )  $\delta$  172.15, 140.56, 140.46, 134.40, 131.07, 128.87, 127.52, 127.14, 122.62, 52.45, 36.62, 33.50, 32.47, 32.33, 26.13, 17.46. **HRMS (ESI) m/z:**  $[\text{M} + \text{H}]^+$  Calcd for  $\text{C}_{21}\text{H}_{20}\text{O}_2\text{N}$ : 318.1489; Found: 318.1485.

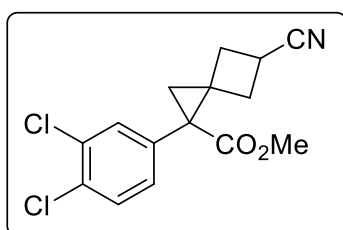

**Compound 3l:** yellow oil, d.r.=1.2:1, 24.2 mg. **major:**  $^1\text{H}$  NMR

(400 MHz,  $\text{CDCl}_3$ )  $\delta$  7.46 (t,  $J$  = 8.1 Hz, 1H), 7.39 (d,  $J$  = 2.1 Hz, 1H), 7.22 (dd,  $J$  = 8.3, 2.2 Hz, 1H), 3.68 (s, 4H), 3.31 - 3.14 (m, 1H), 2.85 - 2.72 (m, 3H), 2.44 (dd,  $J$  = 12.5, 7.8 Hz, 1H), 2.10 - 2.02 (m, 1H), 1.91 (d,  $J$  = 5.2 Hz, 1H), 1.49 (d,  $J$  = 5.2 Hz, 1H).  $^{13}\text{C}$  NMR (101 MHz,  $\text{CDCl}_3$ )  $\delta$  171.2, 135.6, 132.5, 132.4, 130.5, 130.1, 122.0, 52.7, 35.9, 34.1, 32.8, 32.6, 26.4, 17.0. **minor:**  $^1\text{H}$  NMR (400 MHz,  $\text{CDCl}_3$ )  $\delta$  7.46 (t,  $J$  = 8.1 Hz, 1H), 7.37 (d,  $J$  = 2.1 Hz, 1H), 7.12 (dd,  $J$  = 8.3, 2.1 Hz, 1H), 3.67 (s, 3H), 3.31 - 3.14 (m, 1H), 2.85 - 2.72 (m, 2H), 2.36 (dd,  $J$  = 12.8, 9.5 Hz, 1H), 2.16 (dd,  $J$  = 12.0, 6.5 Hz, 1H), 1.98 (d,  $J$  = 5.4 Hz, 1H), 1.55 (d,  $J$  = 5.5 Hz, 1H).  $^{13}\text{C}$  NMR (101 MHz,  $\text{CDCl}_3$ )  $\delta$  171.2, 135.7, 132.6, 131.9, 130.4, 130.1, 122.3, 52.6, 36.0, 33.4, 33.1, 32.2, 26.3, 17.4. **HRMS (ESI) m/z:**  $[\text{M} + \text{H}]^+$  Calcd for  $\text{C}_{15}\text{H}_{14}\text{O}_2\text{NCl}_2$ : 310.0396; Found: 310.0394.

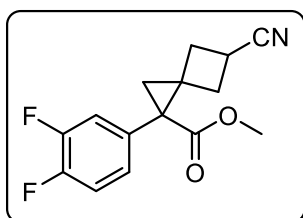

**Compound 3m:** yellow oil, d.r.=1.4:1, 19.7 mg. **major:**  $^1\text{H}$  NMR (400

MHz,  $\text{CDCl}_3$ )  $\delta$  7.21 - 7.09 (m, 3H), 7.09 - 7.04 (m, 1H), 3.67 (s, 4H), 3.30 - 3.21 (m, 1H), 2.84 - 2.69 (m, 3H), 2.44 (dd,  $J$  = 12.5, 7.8 Hz, 1H), 2.10 - 2.01 (m, 1H), 1.89 (d,  $J$  = 5.2 Hz, 1H), 1.47 (d,  $J$  = 5.2 Hz, 1H).  $^{13}\text{C}$  NMR (101 MHz,  $\text{CDCl}_3$ )  $\delta$  171.40, 151.16 (dd,  $J$  = 23.8, 12.6 Hz), 132.40 (q,  $J$  = 6.5 Hz), 126.92 (dd,  $J$  = 6.3, 3.5 Hz), 122.04, 119.77, 119.60, 117.18, 52.56, 35.96, 34.05, 32.76, 32.60, 26.51, 16.90. **minor:**  $^1\text{H}$  NMR (400 MHz,  $\text{CDCl}_3$ )  $\delta$  7.21 - 7.09 (m, 2H), 6.99 (ddt,  $J$  = 8.2, 3.9, 1.8 Hz, 1H), 3.66 (s, 3H), 3.21 - 3.13 (m, 1H), 2.84 - 2.69 (m, 2H), 2.36 (dd,  $J$  = 12.8, 9.5 Hz,

1H), 2.15 (dd,  $J = 12.9, 5.8$  Hz, 1H), 1.96 (d,  $J = 5.5$  Hz, 1H), 1.53 (d,  $J = 5.5$  Hz, 1H).  $^{13}\text{C}$  NMR (101 MHz,  $\text{CDCl}_3$ )  $\delta$  171.40, 148.69 (dd,  $J = 24.1, 12.7$  Hz), 132.40 (q,  $J = 6.5$  Hz), 126.71 (dd,  $J = 6.4, 3.5$  Hz), 122.39, 119.85, 119.68, 117.35, 52.50, 36.09, 33.34, 33.03, 32.12, 26.31, 17.39.  $^{19}\text{F}$  NMR (376 MHz,  $\text{CDCl}_3$ )  $\delta$  -137.23 (dd,  $J = 21.2, 10.2$  Hz), -138.85 (t,  $J = 28.9$  Hz). **HRMS (ESI) m/z:**  $[\text{M} + \text{H}]^+$  Calcd for  $\text{C}_{15}\text{H}_{14}\text{O}_2\text{NF}_2$ : 287.0987; Found: 278.0993.

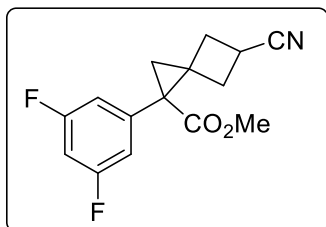

**Compound 3n:** yellow oil, d.r.=1.1:1, 17.5 mg. **major:**  $^1\text{H}$  NMR (400 MHz,  $\text{CDCl}_3$ )  $\delta$  6.90 – 6.85 (m, 1H), 6.85 – 6.74 (m, 2H), 3.69 (s, 3H), 3.31 – 3.22 (m, 1H), 2.86 – 2.78 (m, 1H), 2.78 – 2.71 (m, 1H), 2.46 (dd,  $J = 12.5, 7.9$  Hz, 1H), 2.11 – 2.04 (m, 2H), 1.90 (d,  $J = 5.2$  Hz, 1H), 1.50 (d,  $J = 5.2$  Hz, 1H).  $^{13}\text{C}$  NMR (101 MHz,  $\text{CDCl}_3$ )  $\delta$  171.02, 164.01, 161.67, 139.11 (q,  $J = 9.8$  Hz), 121.90, 113.55 (dd,  $J = 6.9, 3.5$  Hz), 103.41 (t,  $J = 25.2$  Hz), 52.64, 36.29, 34.12, 32.76, 32.72, 26.44, 16.89. **minor:**  $^1\text{H}$  NMR (400 MHz,  $\text{CDCl}_3$ )  $\delta$  6.90 – 6.85 (m, 1H), 6.85 – 6.74 (m, 2H), 3.68 (s, 3H), 3.18 (tt,  $J = 9.4, 5.1$  Hz, 1H), 2.86 – 2.78 (m, 1H), 2.78 – 2.71 (m, 1H), 2.37 (dd,  $J = 12.8, 9.5$  Hz, 1H), 2.21 – 2.14 (m, 1H), 1.97 (d,  $J = 5.5$  Hz, 1H), 1.55 (d,  $J = 5.5$  Hz, 1H).  $^{13}\text{C}$  NMR (101 MHz,  $\text{CDCl}_3$ )  $\delta$  171.02, 164.14, 161.54, 139.11 (q,  $J = 9.8$  Hz), 122.32, 113.73 (dd,  $J = 6.8, 3.6$  Hz), 103.41 (t,  $J = 25.2$  Hz), 52.57, 36.45, 33.35, 33.21, 32.10, 26.21, 17.42.  $^{19}\text{F}$  NMR (376 MHz,  $\text{CDCl}_3$ )  $\delta$  -109.50 (q,  $J = 11.2, 9.8$  Hz). **HRMS (ESI) m/z:**  $[\text{M} + \text{H}]^+$  Calcd for  $\text{C}_{15}\text{H}_{14}\text{O}_2\text{NF}_2$ : 287.0987; Found: 278.0993.

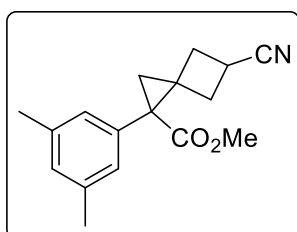

**Compound 3o:** colorless oil, d.r.=1.5:1, 19.7 mg. **major:**  $^1\text{H}$  NMR (400 MHz,  $\text{CDCl}_3$ )  $\delta$  6.96 (s, 2H), 6.93 (s, 3H), 3.67 (s, 4H), 3.29 – 3.21 (m, 2H), 2.88 – 2.71 (m, 3H), 2.52 (dd,  $J = 12.4, 8.0$  Hz, 2H), 2.36 (s, 9H), 2.05 – 1.98 (m, 2H), 1.84 (d,  $J = 4.9$  Hz, 2H), 1.50 (d,  $J = 4.9$  Hz, 2H).  $^{13}\text{C}$  NMR (101 MHz,  $\text{CDCl}_3$ )  $\delta$  172.46, 137.91, 135.09, 129.41, 128.43, 122.32, 52.45, 36.49, 34.35, 33.06, 32.18, 26.65, 21.39, 16.82. **minor:**  $^1\text{H}$  NMR (400 MHz,  $\text{CDCl}_3$ )  $\delta$  6.96 (s, 1H), 6.87 (s, 2H), 3.66 (s, 3H), 3.21 – 3.14 (m, 1H), 2.88 – 2.71 (m, 2H), 2.43 – 2.38 (m, 1H), 2.35 (s, 6H), 2.15 (dd,  $J = 12.7, 6.1$  Hz, 1H), 1.89 (d,  $J = 5.2$  Hz, 1H), 1.55 (d,  $J = 5.2$  Hz, 1H).  $^{13}\text{C}$  NMR (101 MHz,  $\text{CDCl}_3$ )  $\delta$  172.46, 137.91, 135.15, 129.41, 128.43, 122.71, 52.38, 36.75, 33.50, 32.62, 32.38, 26.25, 21.39, 17.41. **HRMS (ESI) m/z:**  $[\text{M} + \text{H}]^+$  Calcd for  $\text{C}_{17}\text{H}_{20}\text{O}_2\text{N}$ : 270.1489; Found: 270.1492.



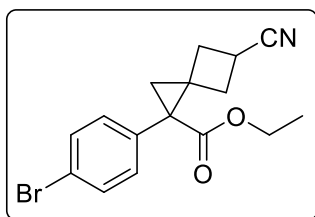

**Compound 3p:** yellow oil, d.r.=1.4:1, 21.7 mg. **major:**  $^1\text{H}$  NMR (400 MHz,  $\text{CDCl}_3$ )  $\delta$  7.49 (ddd,  $J = 8.4, 5.0, 1.7$  Hz, 3H), 7.23 - 7.19 (m, 3H), 4.18 - 4.07 (m, 3H), 3.29 - 3.10 (m, 1H), 2.86 - 2.68 (m, 3H), 2.41 (dd,  $J = 12.5, 7.8$  Hz, 1H), 2.05 - 1.98 (m, 1H), 1.88 (d,  $J = 5.1$  Hz, 1H), 1.46 (d,  $J = 5.1$  Hz, 1H), 1.20 (tdd,  $J = 7.0, 3.2, 1.4$  Hz, 4H).  $^{13}\text{C}$  NMR (101 MHz,  $\text{CDCl}_3$ )  $\delta$  171.1, 134.5, 132.4, 131.6, 122.1, 121.6, 61.4, 36.3, 34.2, 32.8, 32.3, 25.9, 25.8, 17.4, 16.9, 14.3. **minor:**  $^1\text{H}$  NMR (400 MHz,  $\text{CDCl}_3$ )  $\delta$  7.49 (ddd,  $J = 8.4, 5.0, 1.7$  Hz, 2H), 7.16 - 7.13 (m, 2H), 4.18 - 4.07 (m, 2H), 3.29 - 3.10 (m, 1H), 2.86 - 2.68 (m, 2H), 2.36 - 2.28 (m, 1H), 2.10 (ddd,  $J = 12.7, 5.8, 1.5$  Hz, 1H), 1.95 (dd,  $J = 5.4, 1.3$  Hz, 1H), 1.53 (d,  $J = 5.4$  Hz, 1H), 1.20 (tdd,  $J = 7.0, 3.2, 1.4$  Hz, 3H).  $^{13}\text{C}$  NMR (101 MHz,  $\text{CDCl}_3$ )  $\delta$  171.1, 134.6, 132.4, 131.6, 122.5, 121.6, 61.4, 36.4, 33.4, 32.7, 32.2, 25.8, 17.4, 14.3. **HRMS (ESI) m/z:**  $[\text{M} + \text{H}]^+$  Calcd for  $\text{C}_{16}\text{H}_{17}\text{O}_2\text{NBr}$ : 334.0437; Found: 334.0440.

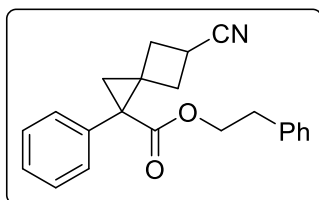

**Compound 3q:** light yellow oil, d.r.=1.3:1, 27.9 mg. **major:**  $^1\text{H}$  NMR (400 MHz,  $\text{CDCl}_3$ )  $\delta$  7.41 - 7.25 (m, 10H), 7.10 - 7.06 (m, 3H), 4.39 (dt,  $J = 11.0, 6.6$  Hz, 1H), 4.26 - 4.17 (m, 1H), 3.26 - 3.16 (m, 1H), 2.88 (td,  $J = 6.7, 2.9$  Hz, 3H), 2.75 - 2.60 (m, 2H), 2.48 (dd,  $J = 12.4, 7.9$  Hz, 1H), 1.99 (ddd,  $J = 12.0, 8.9, 2.3$  Hz, 1H), 1.82 (d,  $J = 4.9$  Hz, 1H), 1.49 (d,  $J = 5.0$  Hz, 1H).  $^{13}\text{C}$  NMR (101 MHz,  $\text{CDCl}_3$ )  $\delta$  171.6, 137.8, 135.3, 130.8, 129.1, 128.5, 128.4, 127.5, 126.6, 122.2, 65.7, 36.7, 35.1, 33.3, 32.9, 32.2, 26.4, 16.8. **minor:**  $^1\text{H}$  NMR (400 MHz,  $\text{CDCl}_3$ )  $\delta$  7.41 - 7.25 (m, 6H), 7.24 - 7.19 (m, 2H), 7.10 - 7.06 (m, 2H), 4.39 (dt,  $J = 11.0, 6.6$  Hz, 1H), 4.26 - 4.17 (m, 1H), 3.08 (tt,  $J = 9.3, 6.5$  Hz, 1H), 2.88 (td,  $J = 6.7, 2.9$  Hz, 2H), 2.75 - 2.60 (m, 2H), 2.31 (dd,  $J = 12.7, 9.4$  Hz, 1H), 2.13 (dd,  $J = 12.7, 6.3$  Hz, 1H), 1.88 (d,  $J = 5.3$  Hz, 1H), 1.52 (d,  $J = 5.3$  Hz, 1H).  $^{13}\text{C}$  NMR (101 MHz,  $\text{CDCl}_3$ )  $\delta$  171.5, 137.9, 135.4, 130.8, 129.1, 128.5, 128.4, 127.6, 126.6, 122.6, 65.6, 37.0, 34.0, 32.7, 32.3, 32.2, 25.8, 17.4. **HRMS (ESI) m/z:**  $[\text{M} + \text{H}]^+$  Calcd for  $\text{C}_{22}\text{H}_{22}\text{O}_2\text{N}$ : 332.1645; Found: 332.1646.

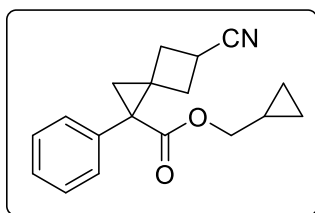

**Compound 3r:** light yellow oil, d.r.=1.4:1, 25.9 mg. **major:**  $^1\text{H}$  NMR (400 MHz,  $\text{CDCl}_3$ )  $\delta$  7.42 - 7.26 (m, 7H), 4.01 - 3.86 (m, 3H), 2.86 (dd,  $J = 12.3, 8.0$  Hz, 1H), 2.80 - 2.73 (m, 1H), 2.47 (dd,  $J = 12.4, 7.9$  Hz, 1H), 2.04 - 1.99 (m, 1H), 1.90 (d,  $J = 5.0$  Hz, 2H), 1.53 (d,  $J = 5.0$  Hz, 1H), 1.09 (pq,  $J = 8.2, 4.6$  Hz, 1H), 0.58 - 0.50 (m, 3H), 0.24 (dq,  $J = 6.0, 4.5$  Hz, 3H).  $^{13}\text{C}$  NMR (101 MHz,  $\text{CDCl}_3$ )  $\delta$  171.7, 135.5, 130.7, 128.4, 127.5, 122.3, 69.6, 36.9, 34.4, 32.9, 32.2, 25.9, 16.9, 10.0, 3.2. **minor:**  $^1\text{H}$  NMR (400 MHz,  $\text{CDCl}_3$ )  $\delta$  7.42 - 7.26 (m, 5H), 4.01 - 3.86 (m, 2H), 2.86 (dd,  $J = 12.3, 8.0$  Hz, 1H), 2.80 - 2.73 (m, 1H), 2.36 (dd,  $J = 12.6, 9.5$  Hz, 1H), 2.12 (ddd,  $J = 12.7, 6.0, 1.4$  Hz, 1H), 1.97 (d,  $J = 5.4$  Hz, 1H), 1.58 (d,  $J = 5.3$  Hz, 1H), 1.09 (pq,  $J = 8.2, 4.6$  Hz, 1H), 0.58 - 0.50 (m, 2H), 0.24 (dq,  $J = 6.0, 4.5$  Hz, 2H).  $^{13}\text{C}$  NMR (101 MHz,  $\text{CDCl}_3$ )  $\delta$  171.7, 135.5, 130.6, 128.4, 127.5, 122.7, 69.6, 37.1, 33.6, 32.6, 32.3, 25.6, 17.4, 9.9, 3.2. **HRMS (ESI) m/z:**  $[\text{M} + \text{H}]^+$  Calcd for  $\text{C}_{18}\text{H}_{20}\text{O}_2\text{N}$ : 282.1489; Found: 282.1488.

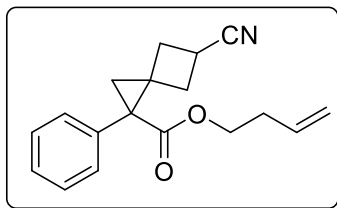

**Compound 3s:** yellow oil, d.r.=1.2:1, 21.4 mg. **major:**  $^1\text{H NMR}$  (400 MHz,  $\text{CDCl}_3$ )  $\delta$  7.35 (dt,  $J = 7.7, 5.4$  Hz, 2H), 7.31 - 7.27 (m, 2H), 7.25 - 7.21 (m, 1H), 5.74 - 5.62 (m, 1H), 5.08 - 5.01 (m, 2H), 4.17 (dq,  $J = 10.8, 6.8$  Hz, 1H), 4.04 (dt,  $J = 10.6, 6.5$  Hz, 1H), 3.26 - 3.09 (m, 1H), 2.85 - 2.69 (m, 2H), 2.45 (dd,  $J = 12.4, 7.9$  Hz, 1H), 2.34 - 2.28 (m, 2H), 1.99 (tt,  $J = 9.2, 1.7$  Hz, 1H), 1.84 (d,  $J = 5.0$  Hz, 1H), 1.49 (d,  $J = 5.0$  Hz, 1H).  $^{13}\text{C NMR}$  (101 MHz,  $\text{CDCl}_3$ )  $\delta$  171.6, 135.3, 133.9, 130.7, 128.4, 127.5, 122.6, 117.5, 64.2, 36.8, 34.3, 33.2, 32.9, 32.2, 26.1, 16.9. **minor:**  $^1\text{H NMR}$  (400 MHz,  $\text{CDCl}_3$ )  $\delta$  7.35 (dt,  $J = 7.7, 5.4$  Hz, 2H), 7.31 - 7.27 (m, 2H), 7.25 - 7.21 (m, 1H), 5.74 - 5.62 (m, 1H), 5.08 - 5.01 (m, 2H), 4.17 (dq,  $J = 10.8, 6.8$  Hz, 1H), 4.04 (dt,  $J = 10.6, 6.5$  Hz, 1H), 3.26 - 3.09 (m, 1H), 2.85 - 2.69 (m, 2H), 2.34 - 2.28 (m, 3H), 2.11 (dd,  $J = 12.7, 6.1$  Hz, 1H), 1.91 (d,  $J = 5.3$  Hz, 1H), 1.54 (d,  $J = 5.3$  Hz, 1H).  $^{13}\text{C NMR}$  (101 MHz,  $\text{CDCl}_3$ )  $\delta$  171.6, 135.4, 134.0, 130.7, 128.4, 127.5, 122.2, 117.4, 64.2, 37.0, 33.6, 33.2, 32.7, 32.3, 25.7, 17.4. **HRMS (ESI) m/z:**  $[\text{M} + \text{H}]^+$  Calcd for  $\text{C}_{18}\text{H}_{20}\text{O}_2\text{N}$ : 282.1489; Found: 282.1488.

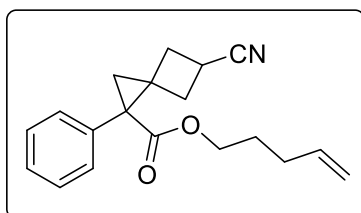

**Compound 3t:** yellow oil, d.r.=1.4:1, 18.4 mg. **major:**  $^1\text{H NMR}$  (400 MHz,  $\text{CDCl}_3$ )  $\delta$  7.42 - 7.30 (m, 7H), 5.83 - 5.77 (m, 1H), 5.04 - 4.94 (m, 3H), 4.12 (ddt,  $J = 10.8, 8.5, 6.6$  Hz, 1H), 4.07 - 3.99 (m, 1H), 3.29 - 3.21 (m, 1H), 2.84 (ddd,  $J = 12.2, 8.5, 3.5$  Hz, 1H), 2.80 - 2.72 (m, 1H), 2.49 (dd,  $J = 12.4, 7.9$  Hz, 1H), 2.08 - 1.98 (m, 3H), 1.87 (d,  $J = 5.0$  Hz, 1H), 1.62 - 1.54 (m, 3H), 1.52 (d,  $J = 5.0$  Hz, 1H), 1.38 (qd,  $J = 8.0, 3.2$  Hz, 3H).  $^{13}\text{C NMR}$  (101 MHz,  $\text{CDCl}_3$ )  $\delta$  171.70, 138.33, 135.40, 130.68, 128.38, 127.50, 122.25, 114.87, 65.14, 36.86, 34.28, 33.13, 32.93, 32.32, 27.97, 26.11, 25.09, 16.90. **minor:**  $^1\text{H NMR}$  (400 MHz,  $\text{CDCl}_3$ )  $\delta$  7.42 - 7.30 (m, 3H), 7.29 - 7.25 (m, 2H), 5.77 - 5.72 (m, 1H), 5.04 - 4.94 (m, 2H), 4.12 (ddt,  $J = 10.8, 8.5, 6.6$  Hz, 1H), 4.07 - 3.99 (m, 1H), 3.21 - 3.13 (m, 1H), 2.84 (ddd,  $J = 12.2, 8.5, 3.5$  Hz, 1H), 2.80 - 2.72 (m, 1H), 2.40 - 2.34 (m, 1H), 2.14 (ddt,  $J = 12.7, 6.0, 1.4$  Hz, 1H), 2.08 - 1.98 (m, 3H), 1.94 (d,  $J = 5.3$  Hz, 1H), 1.62 - 1.54 (m, 3H), 1.38 (qd,  $J = 8.0, 3.2$  Hz, 2H).  $^{13}\text{C NMR}$  (101 MHz,  $\text{CDCl}_3$ )  $\delta$  171.70, 138.29, 135.47, 130.63, 128.38, 127.53, 122.62, 114.90, 65.08, 37.02, 33.53, 33.13, 32.59, 32.14, 27.97, 25.78, 25.10, 17.45. **HRMS (ESI) m/z:**  $[\text{M} + \text{H}]^+$  Calcd for  $\text{C}_{19}\text{H}_{22}\text{O}_2\text{N}$ : 296.1645; Found: 296.1644.

# <sup>1</sup>H NMR and <sup>13</sup>C NMR Spectra for Products

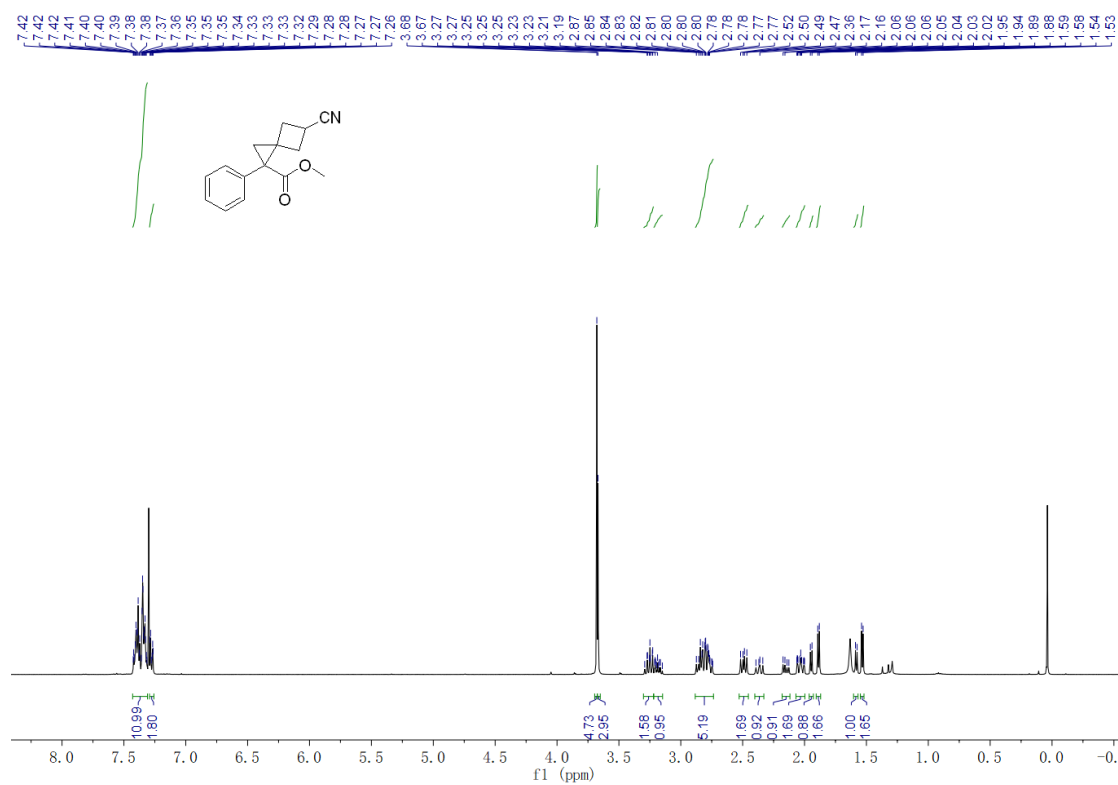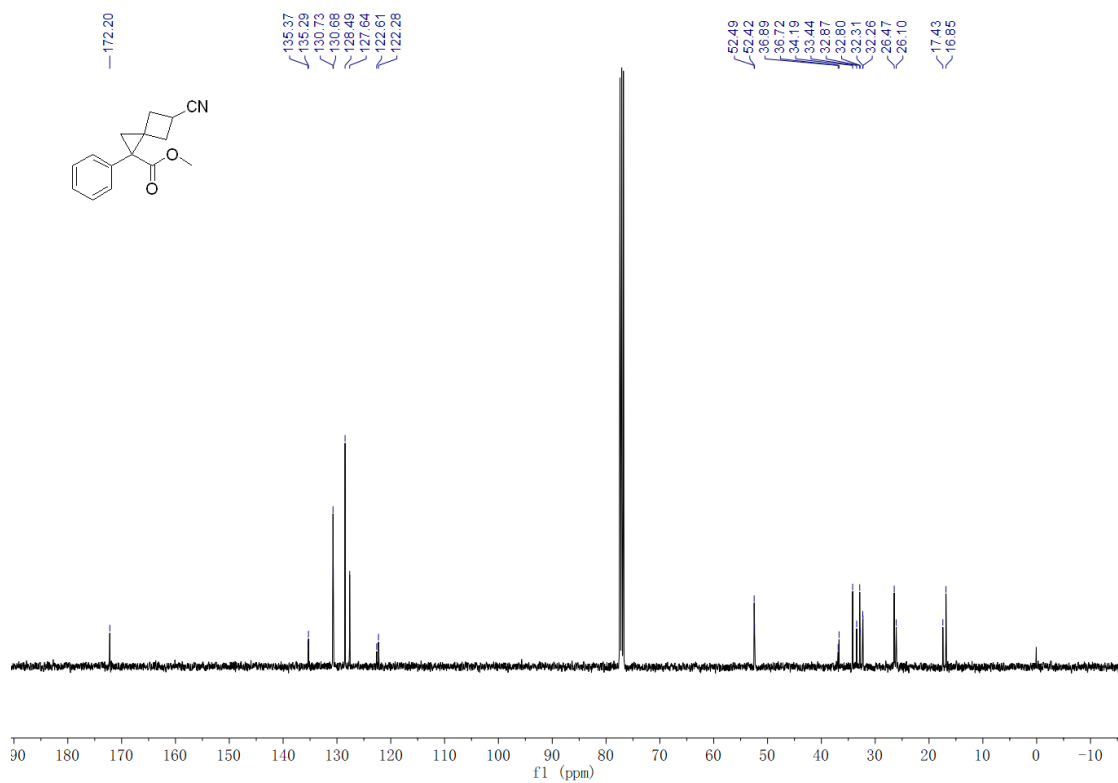

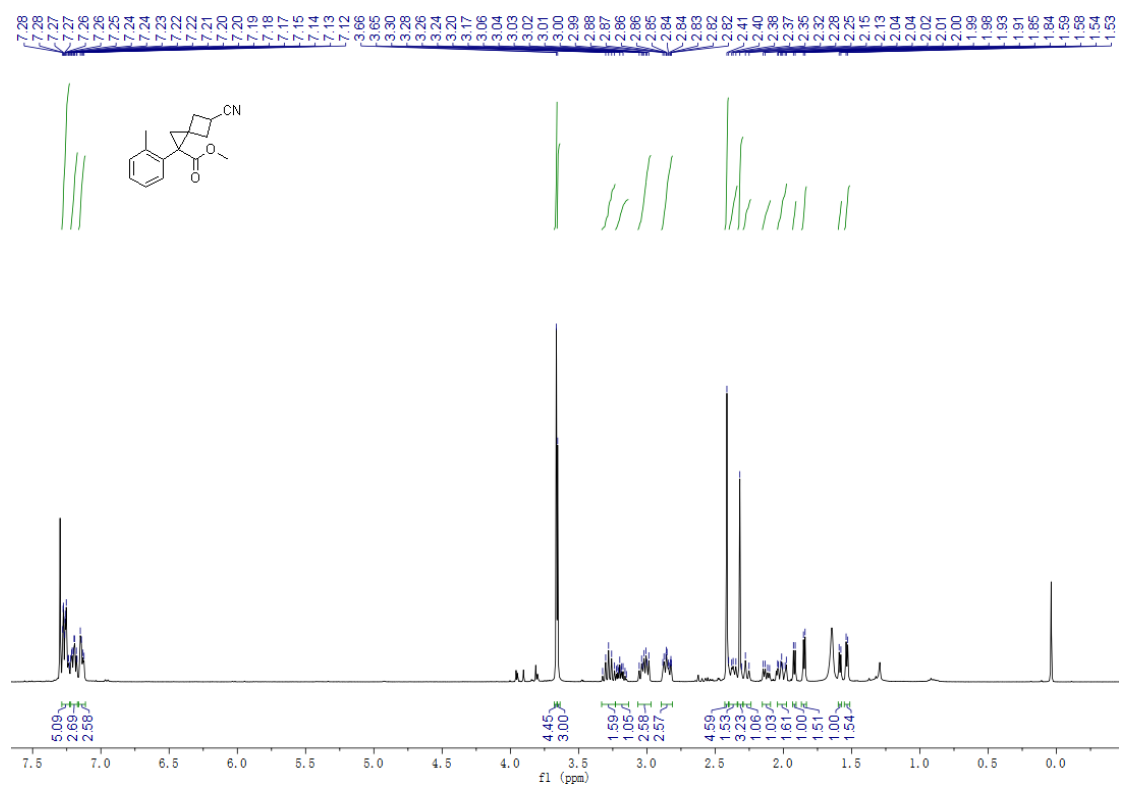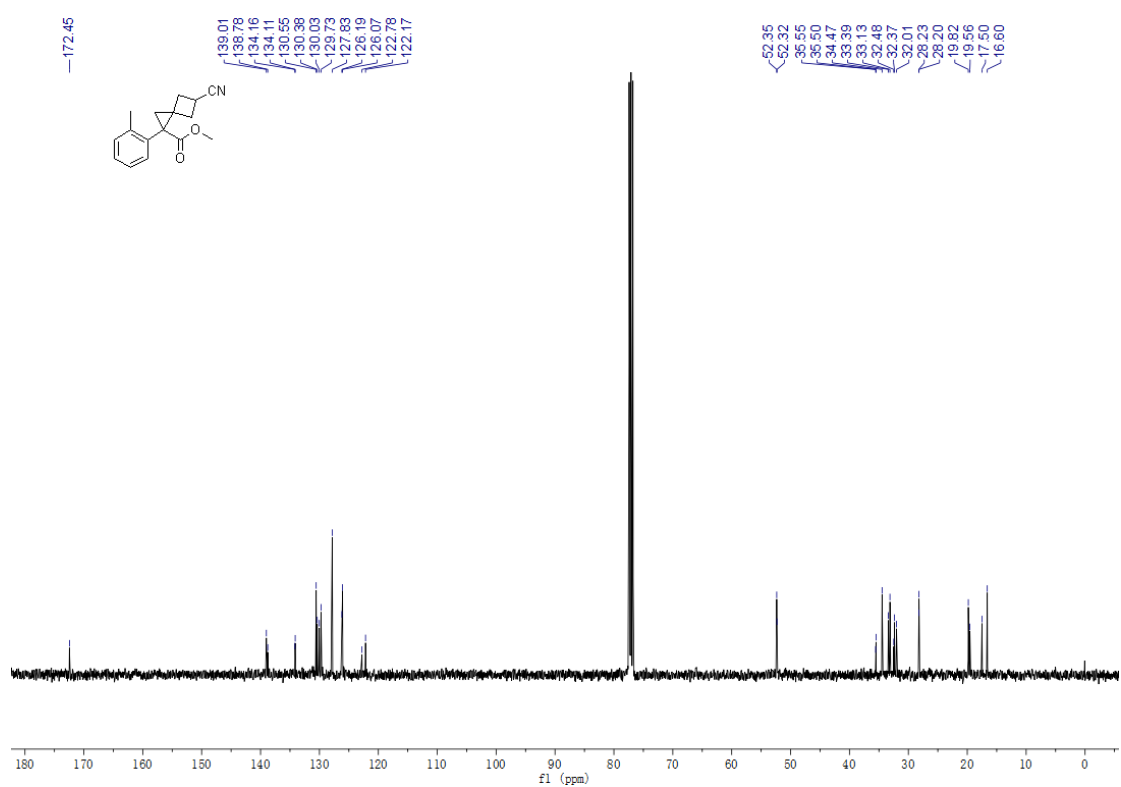

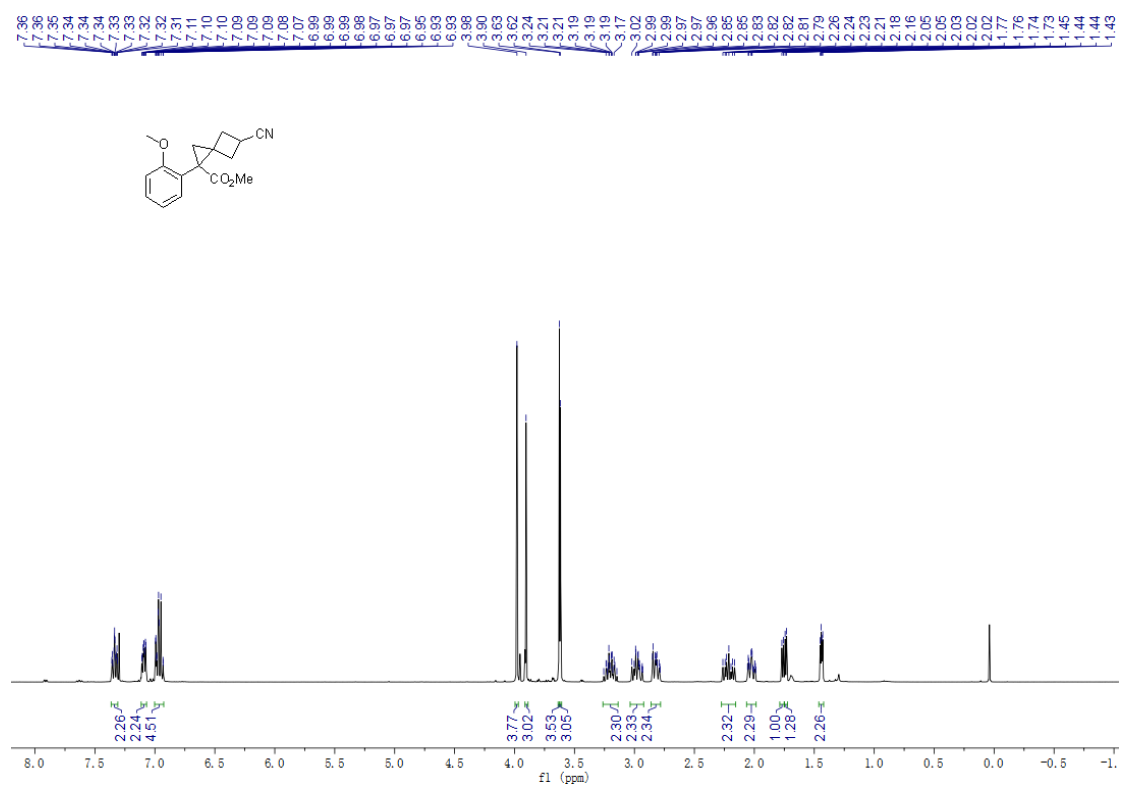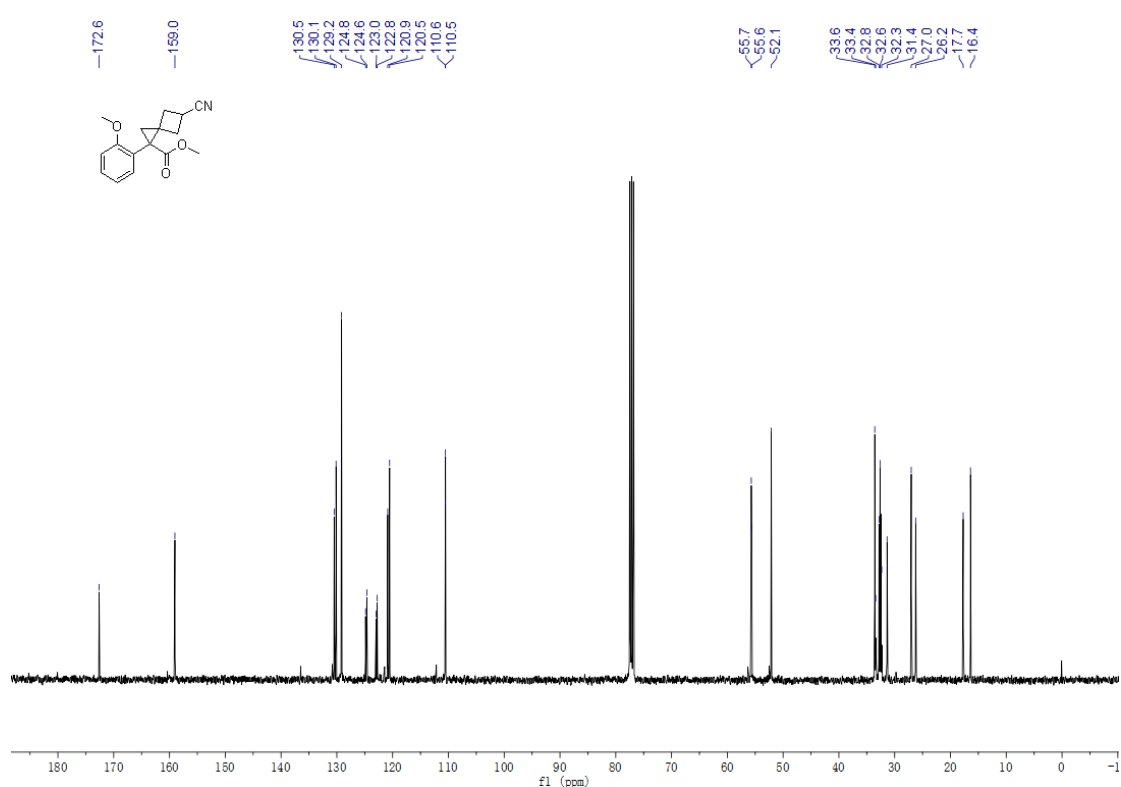

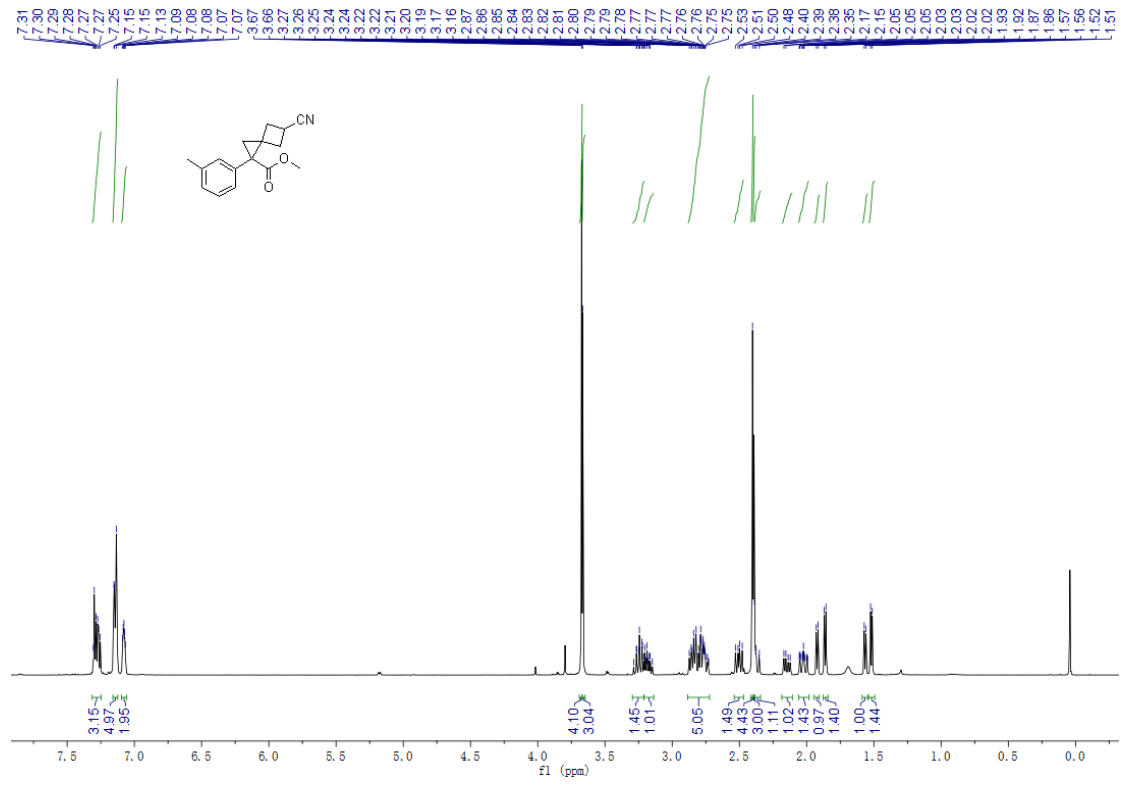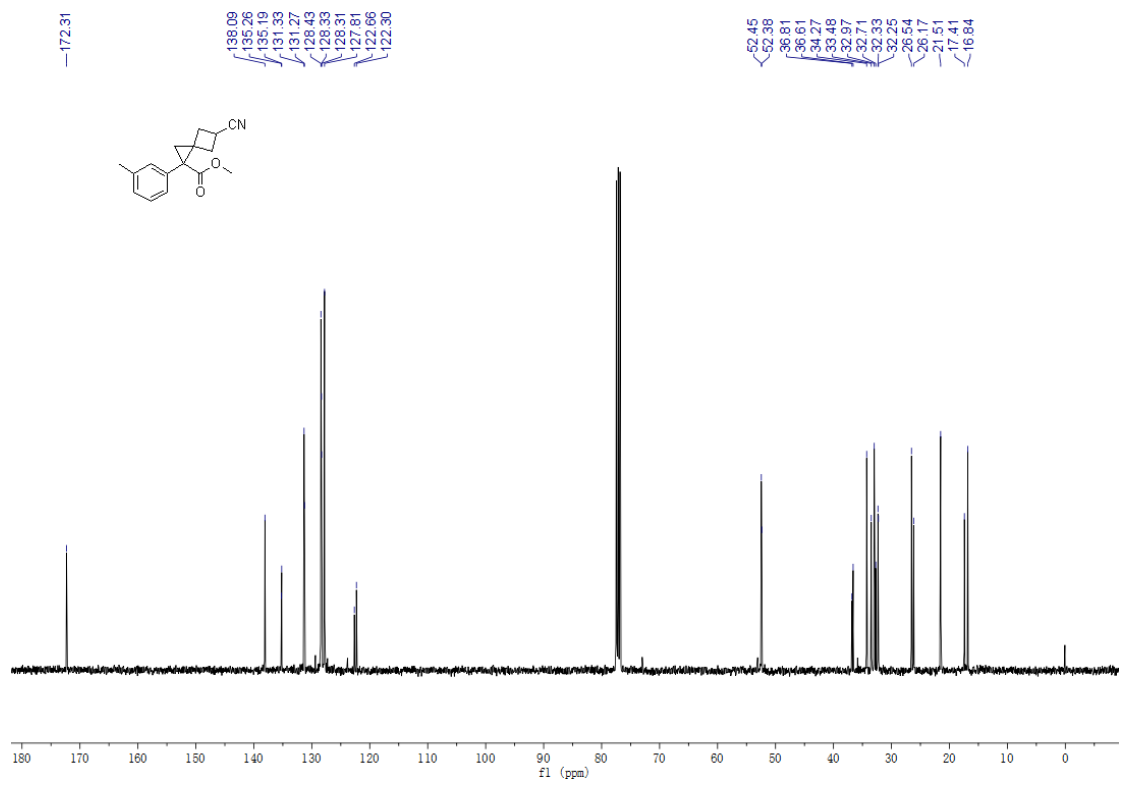

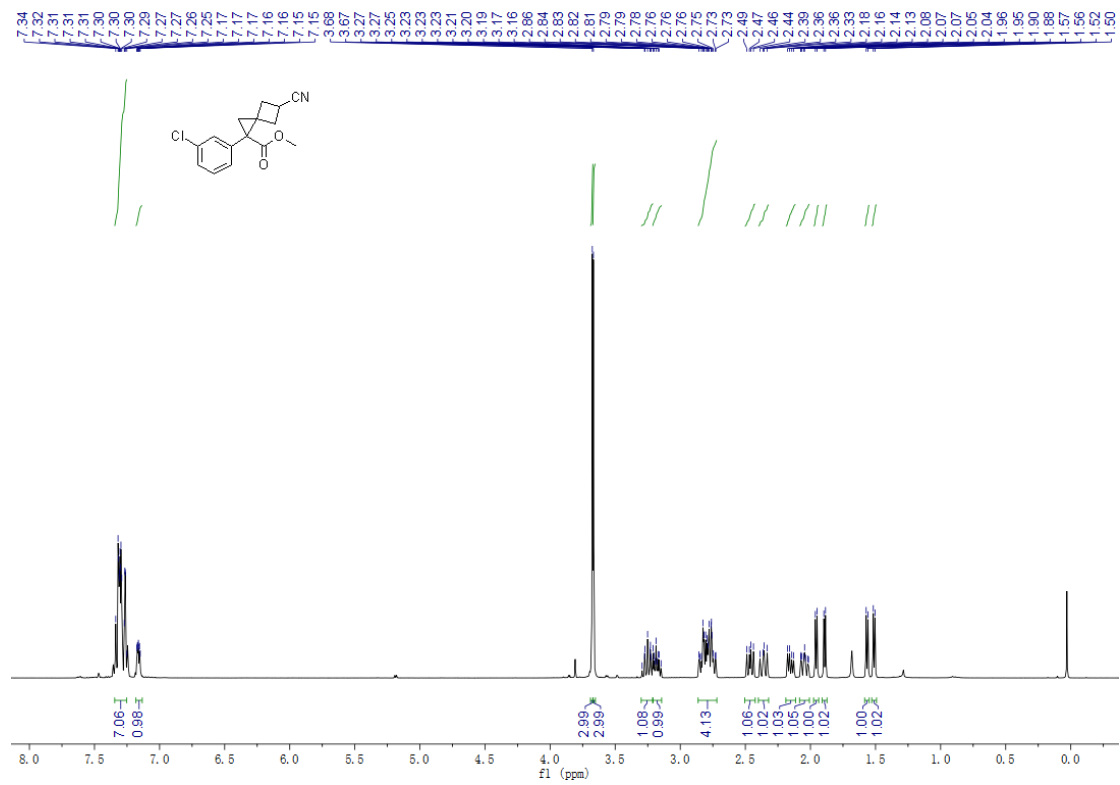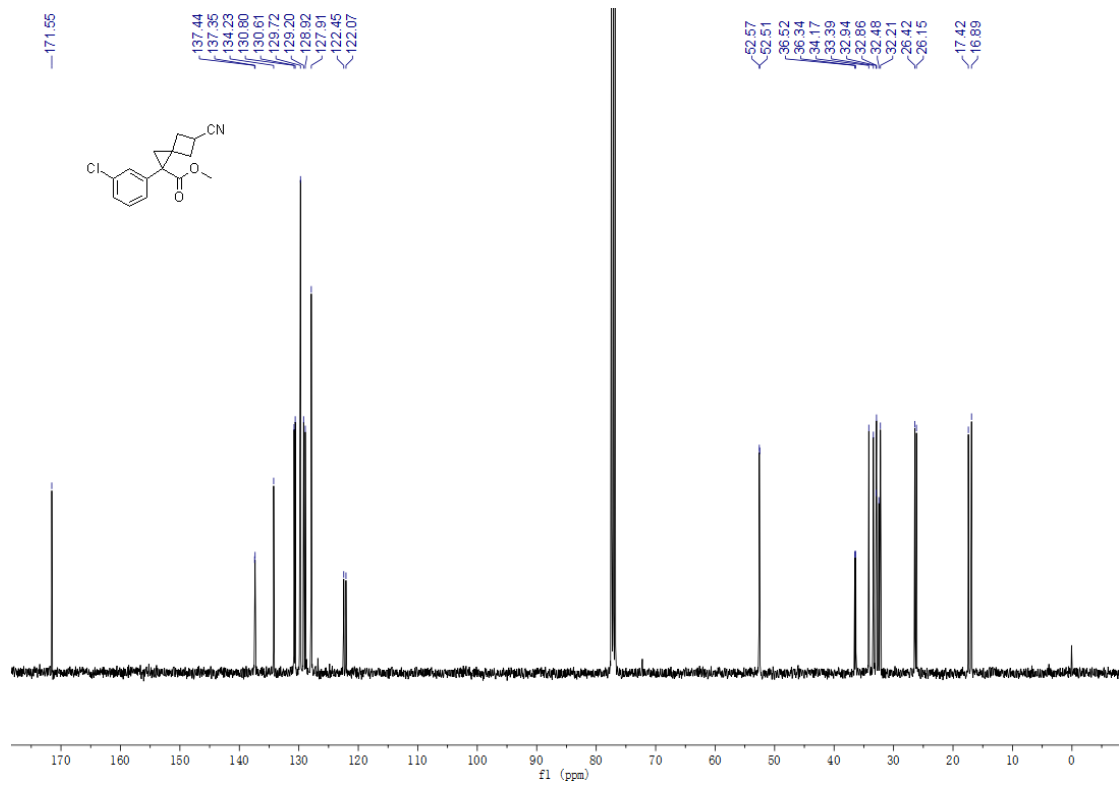

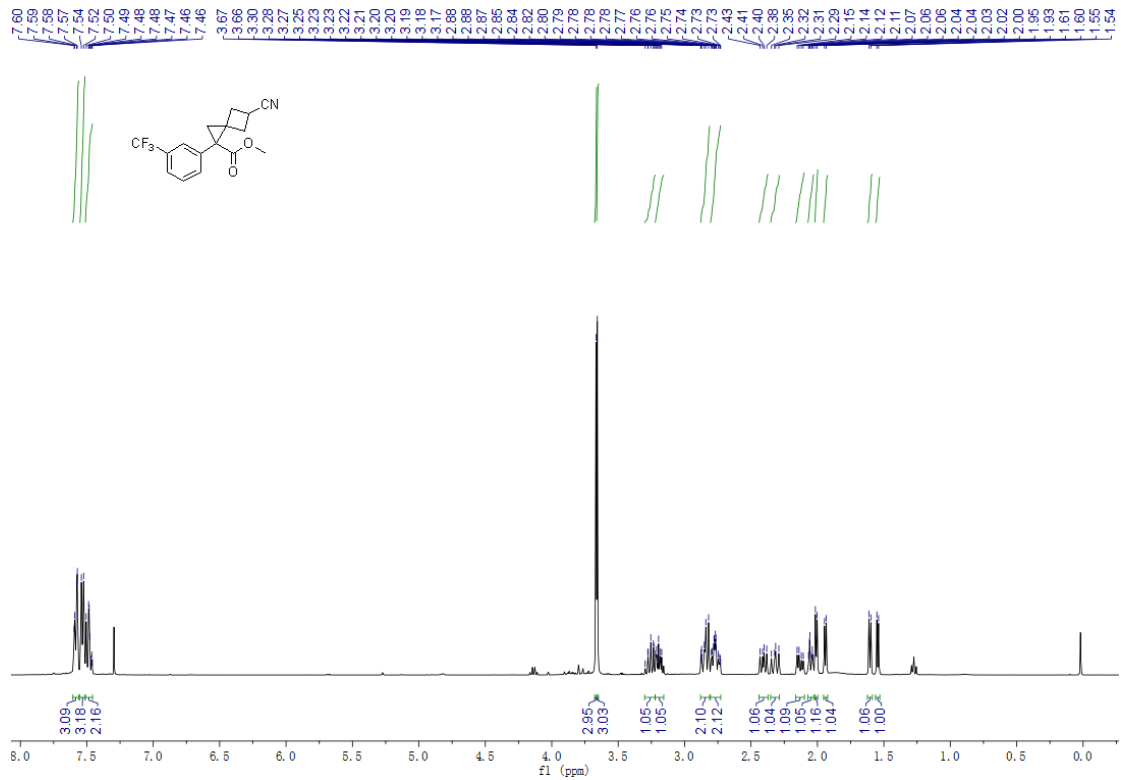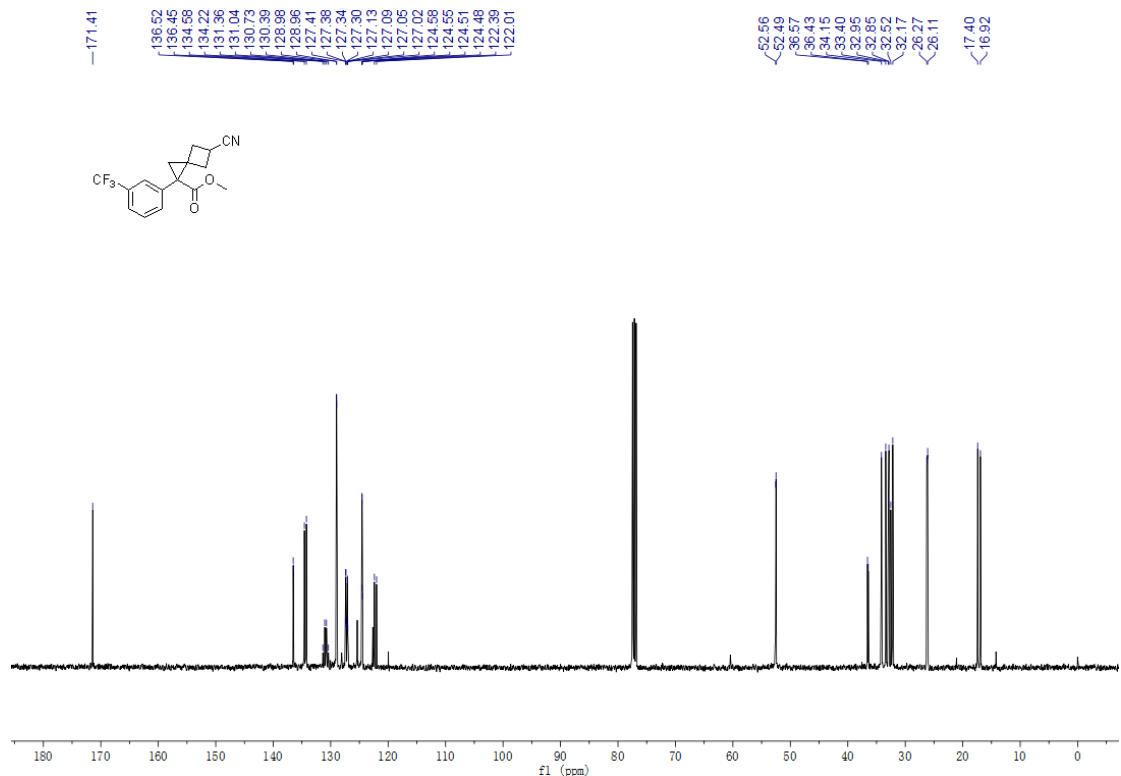



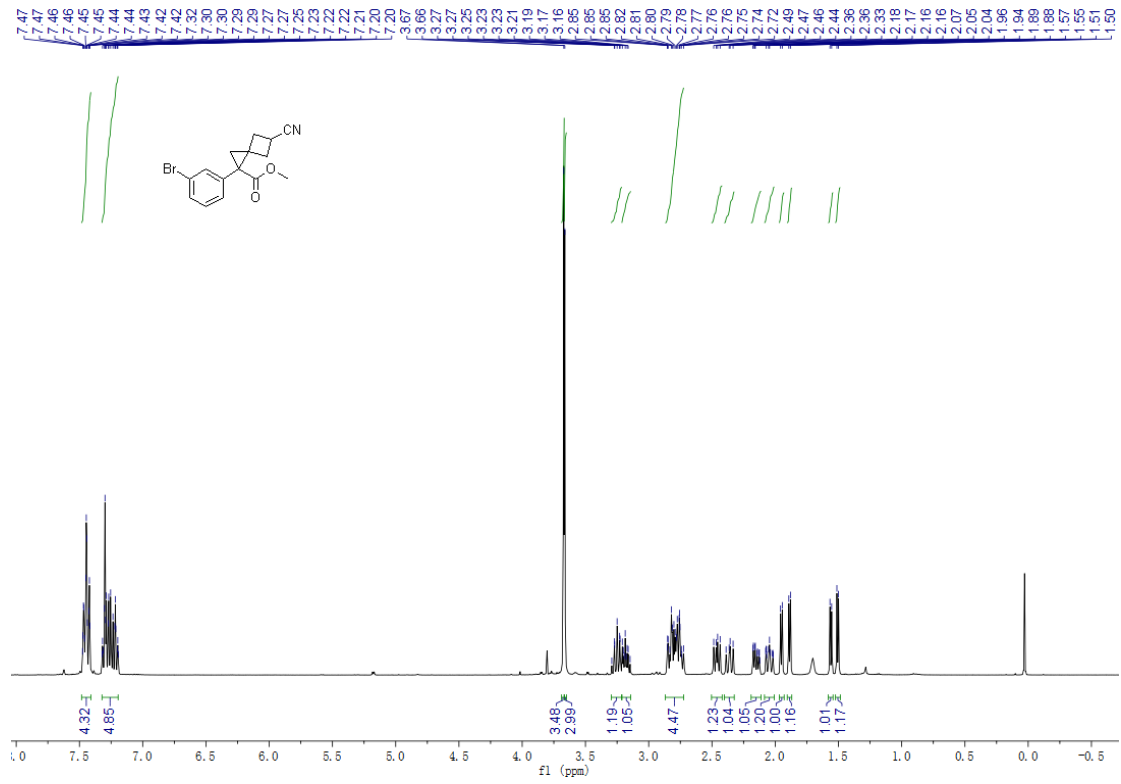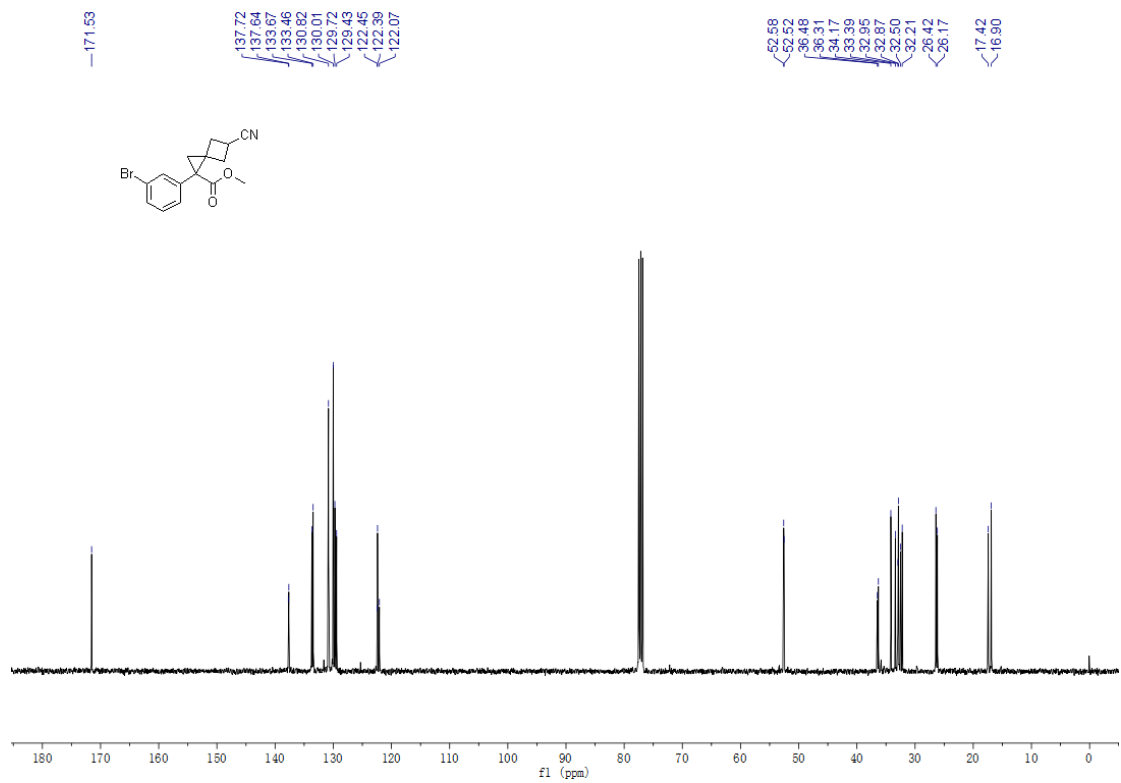

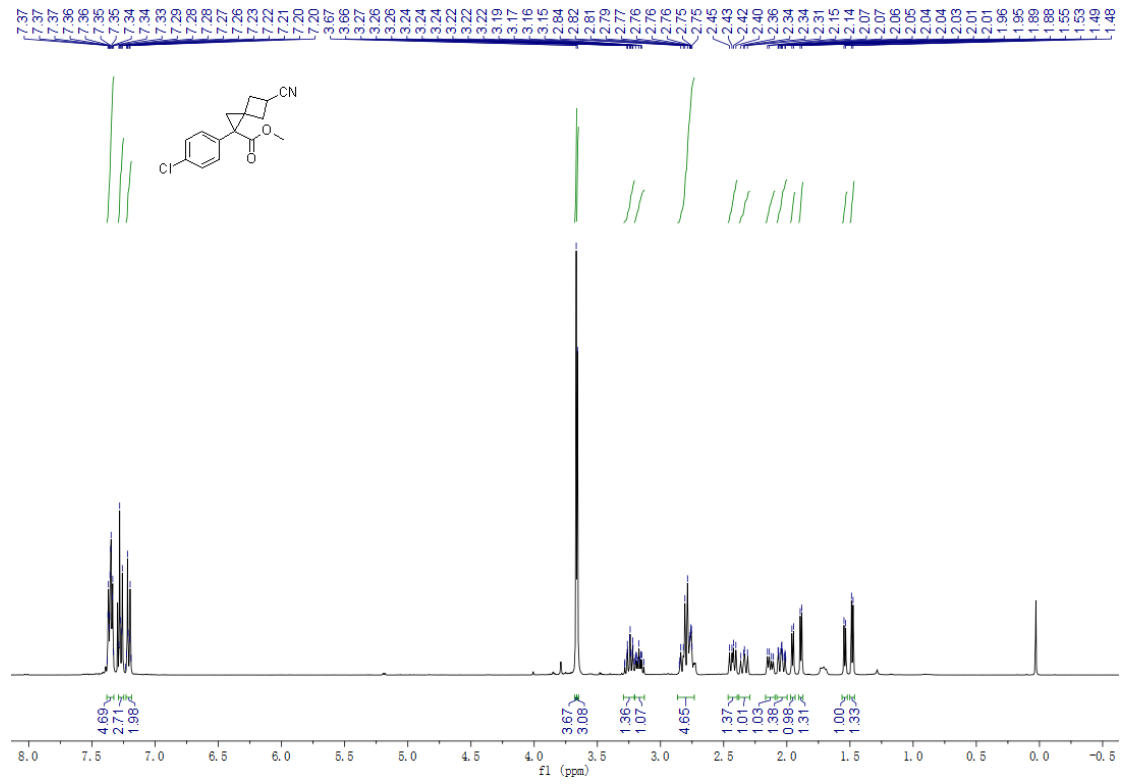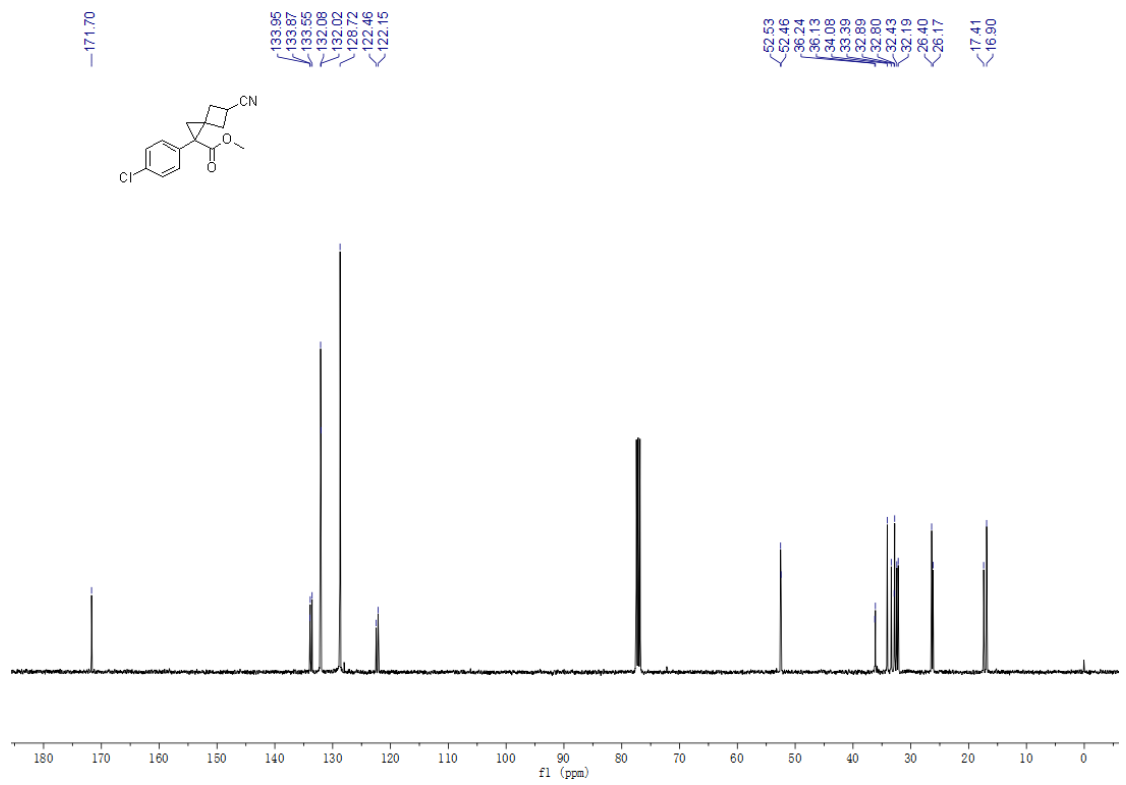

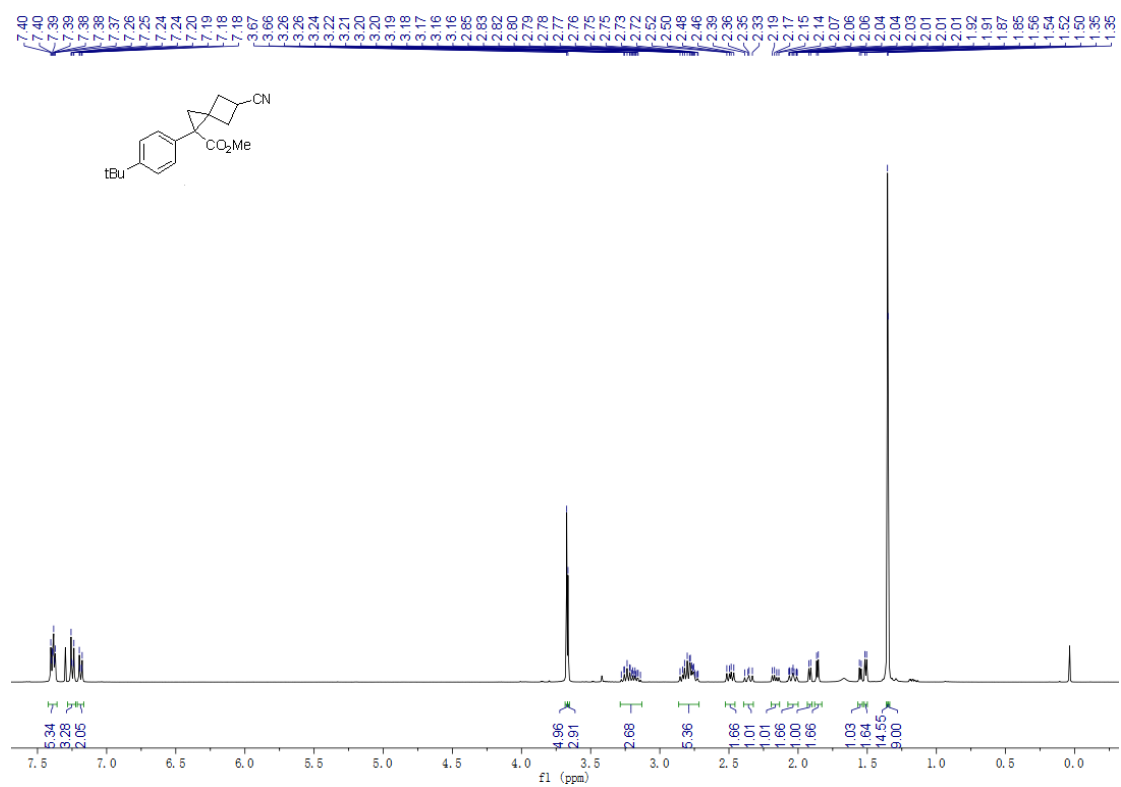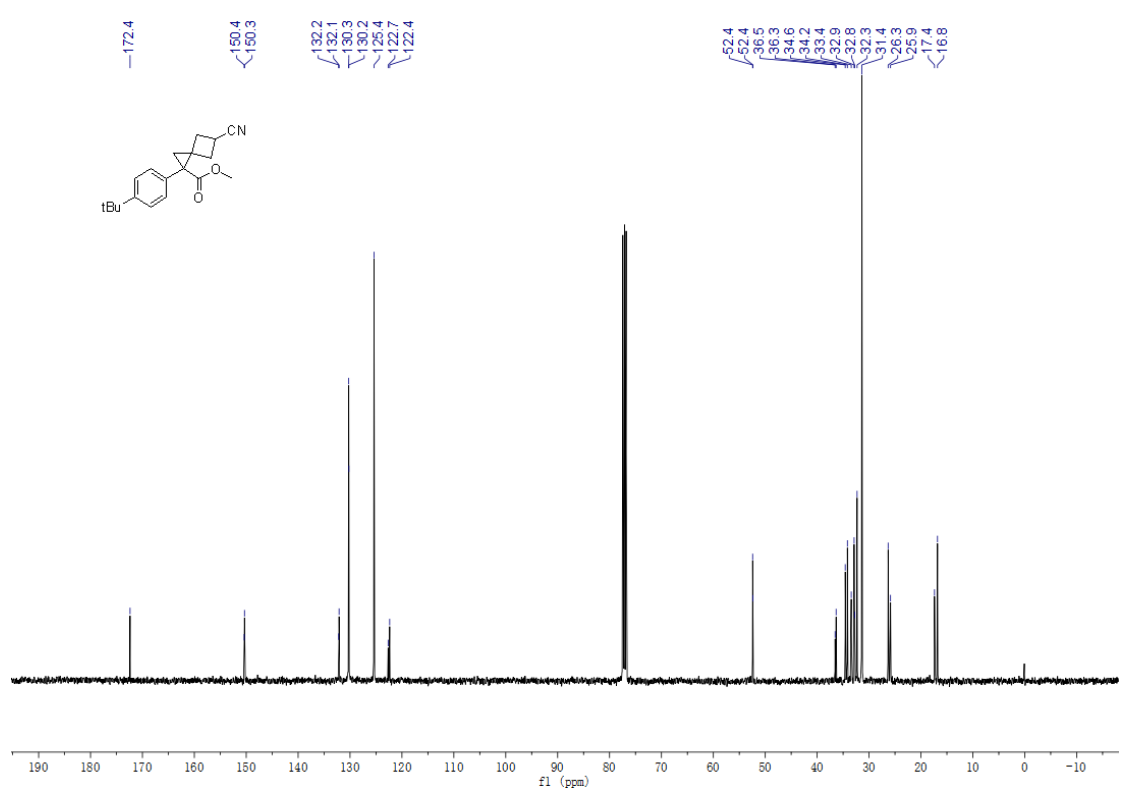

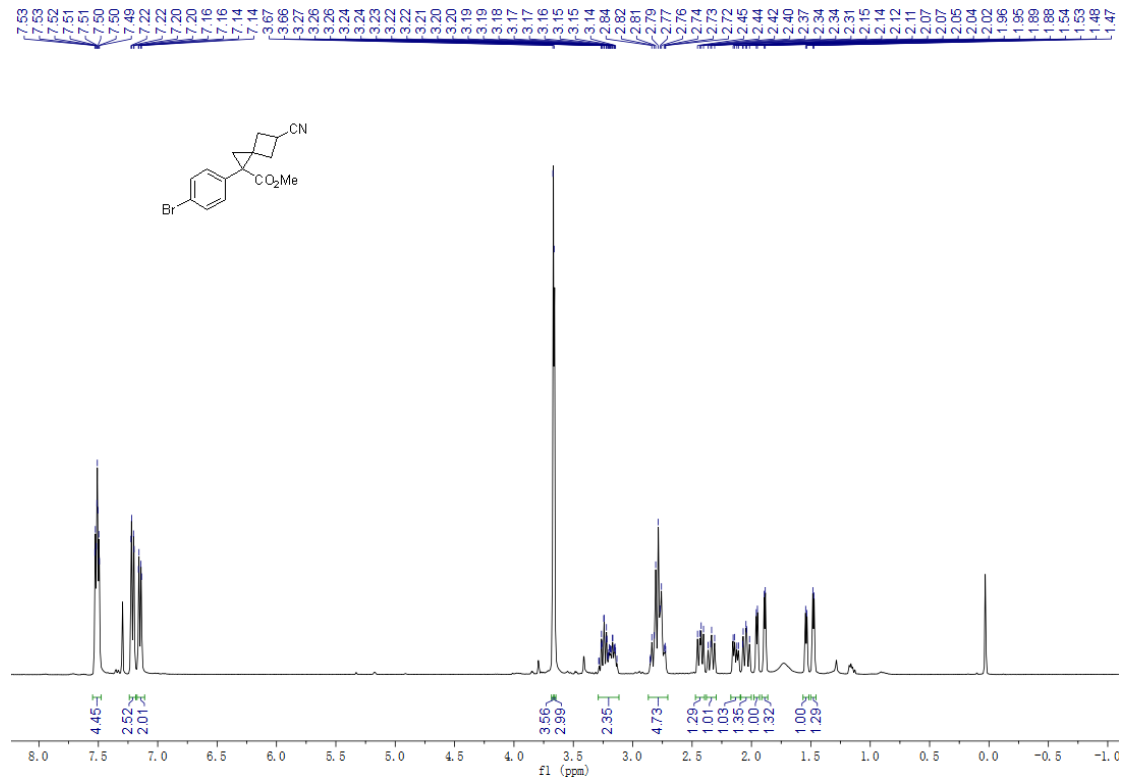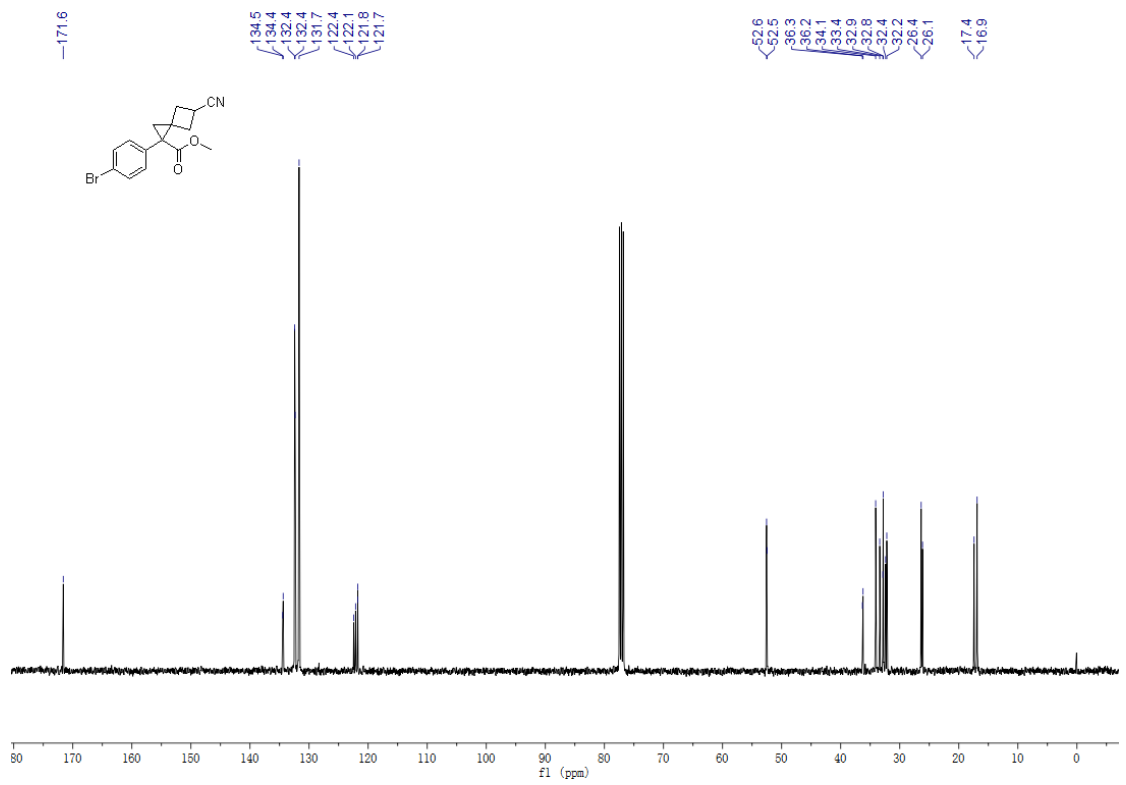

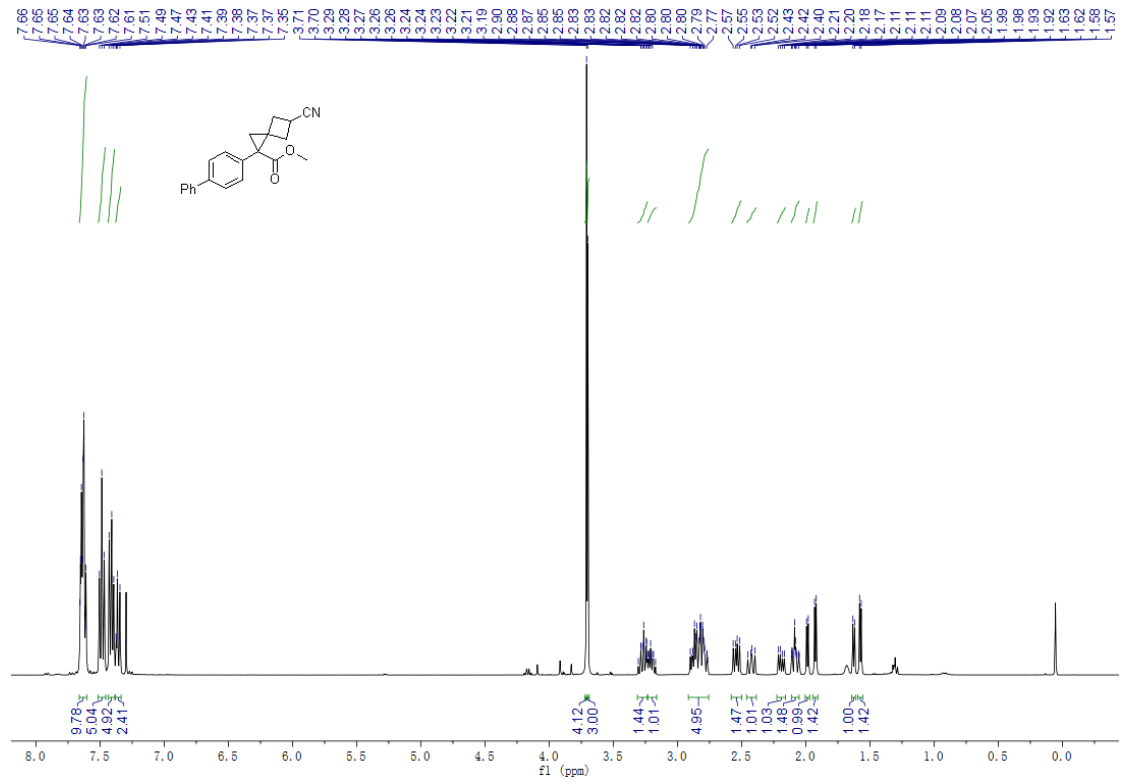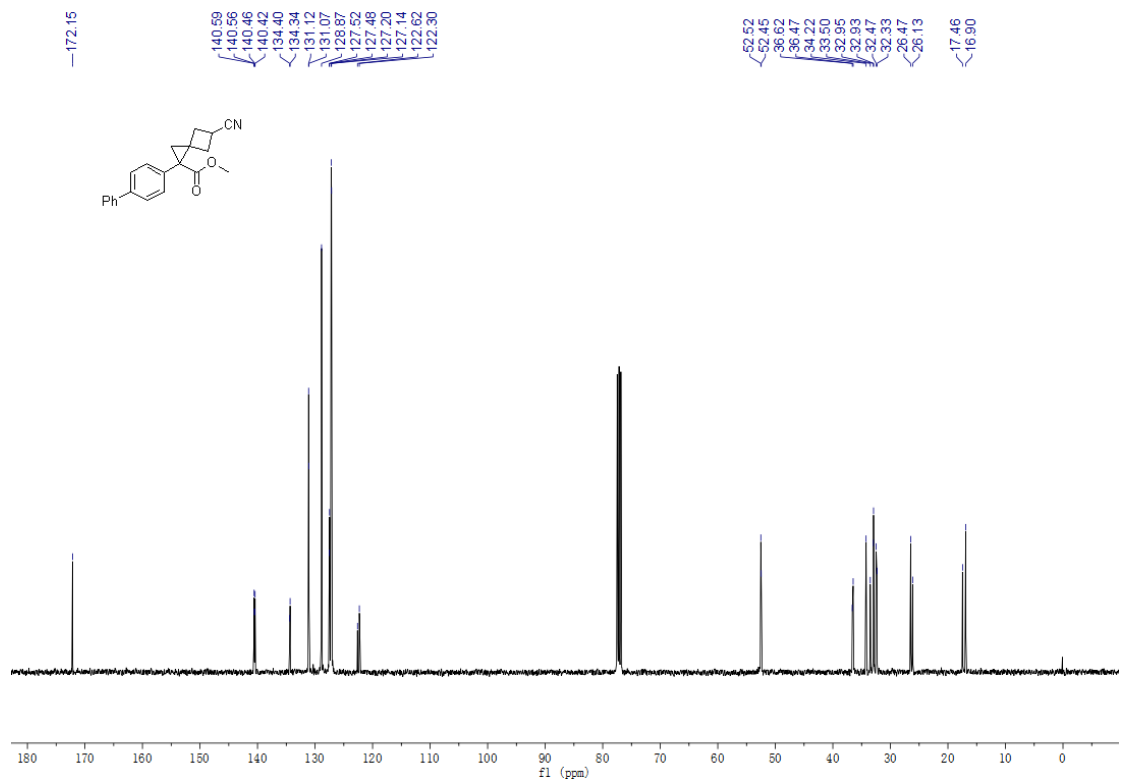

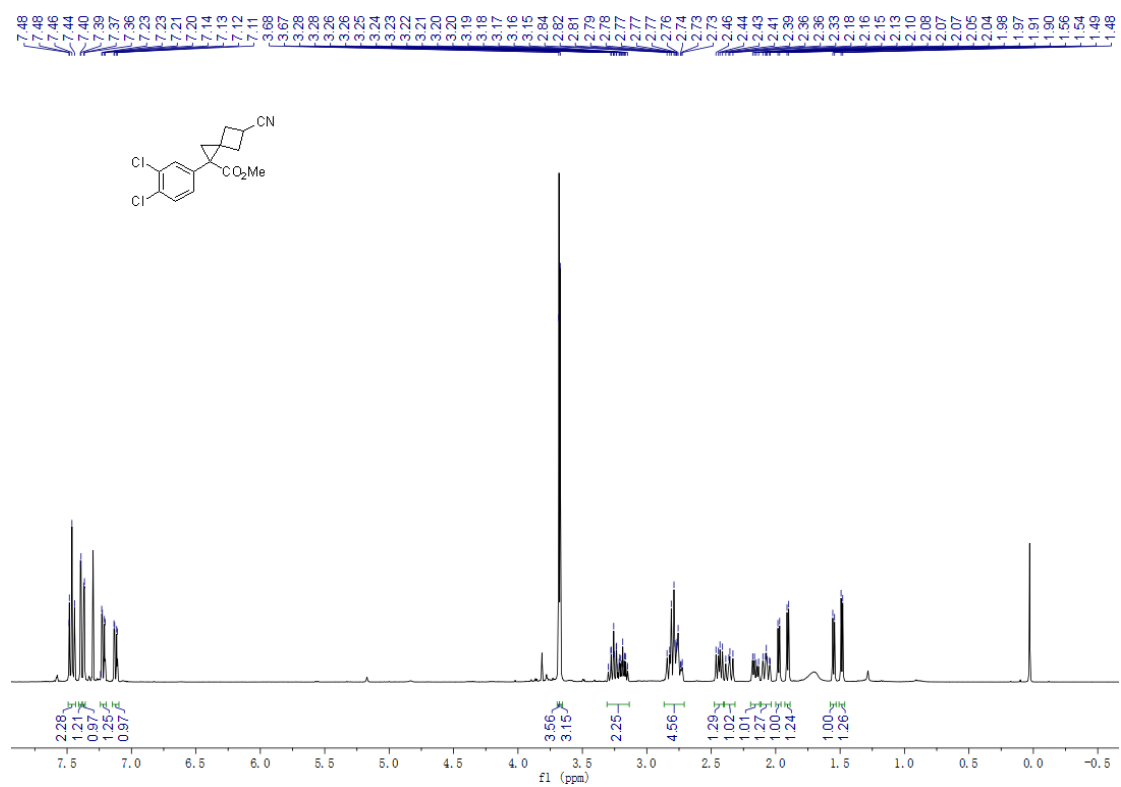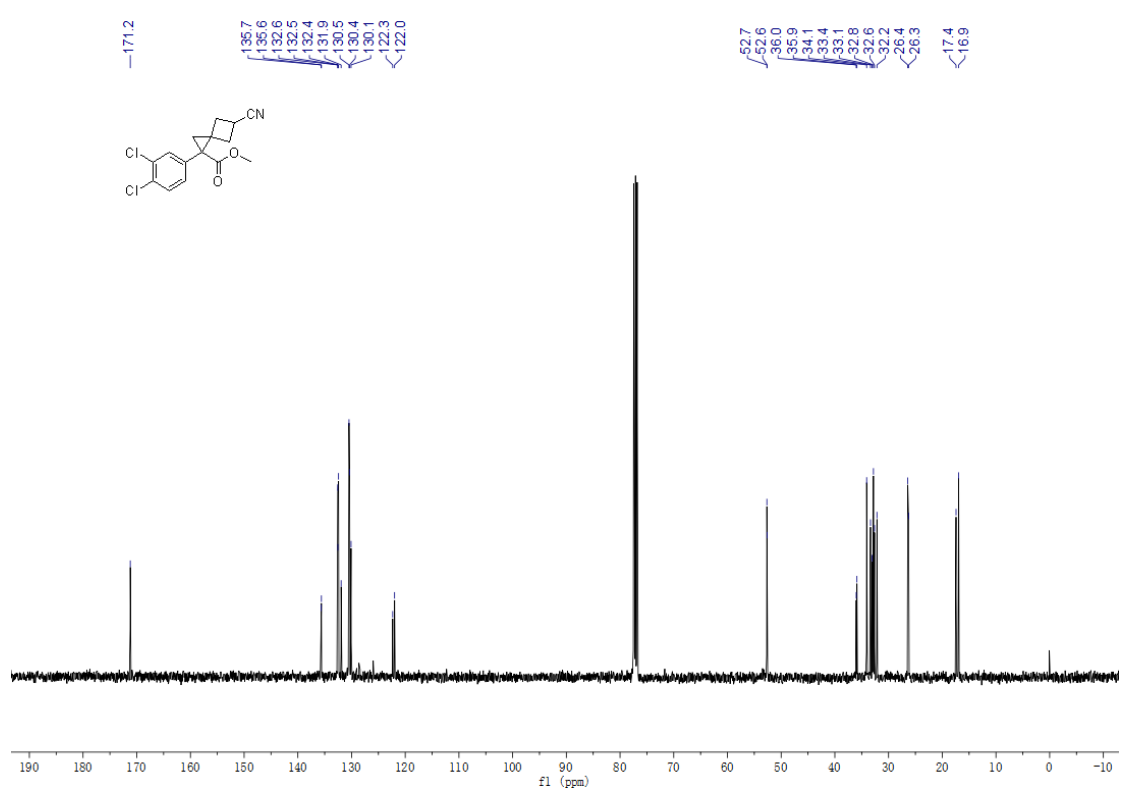

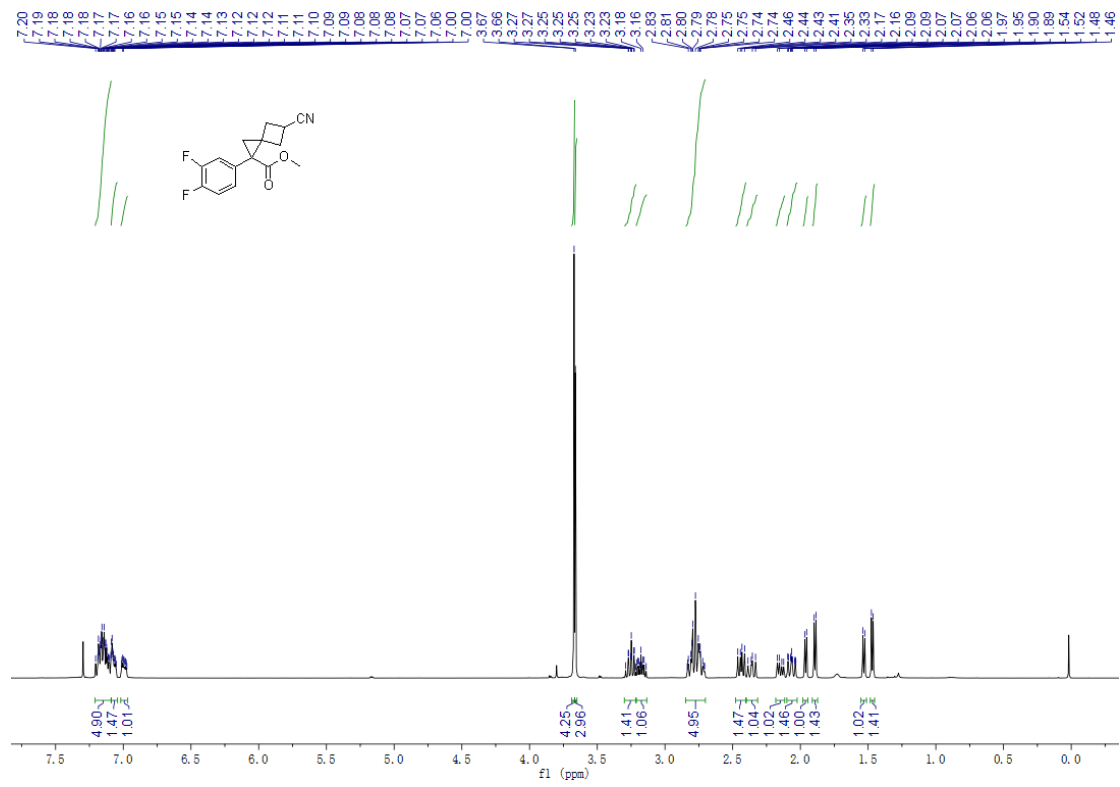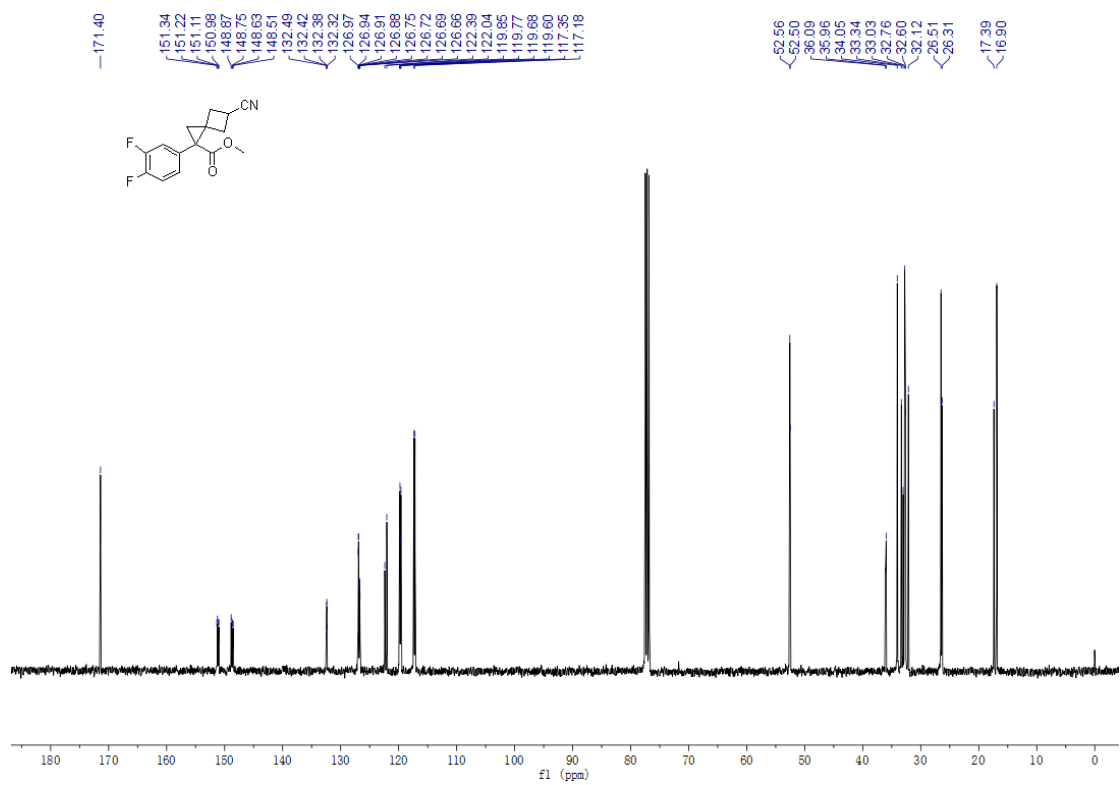

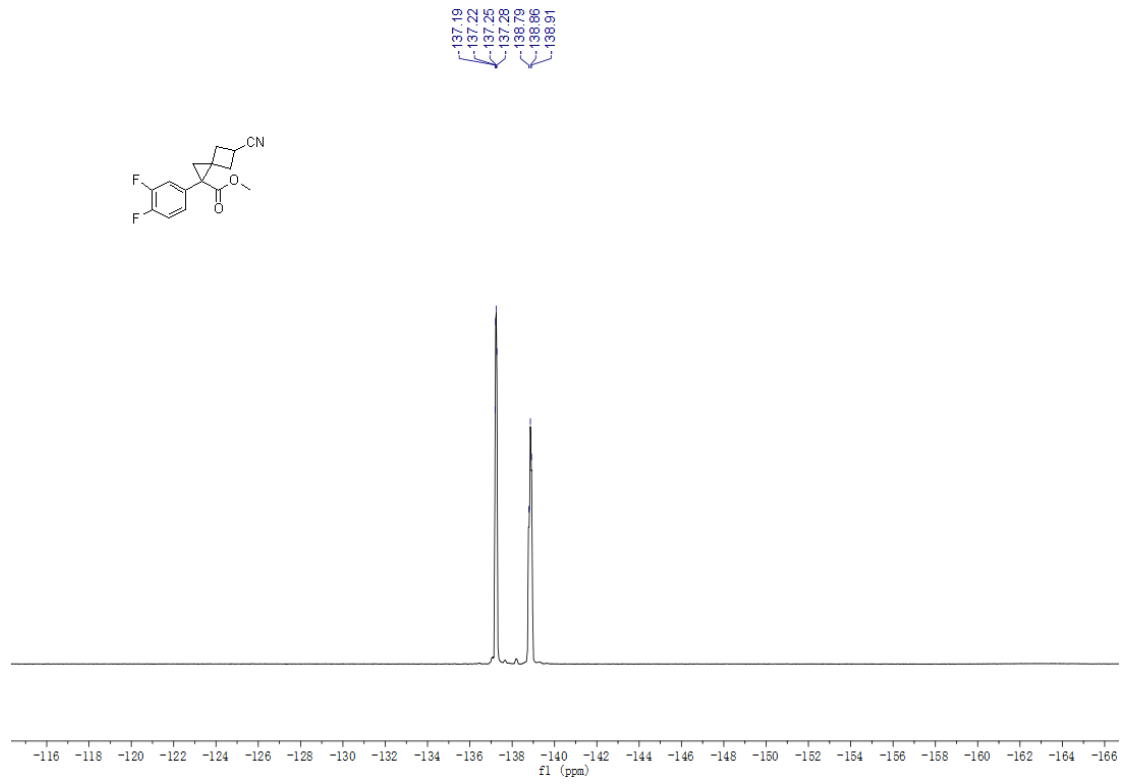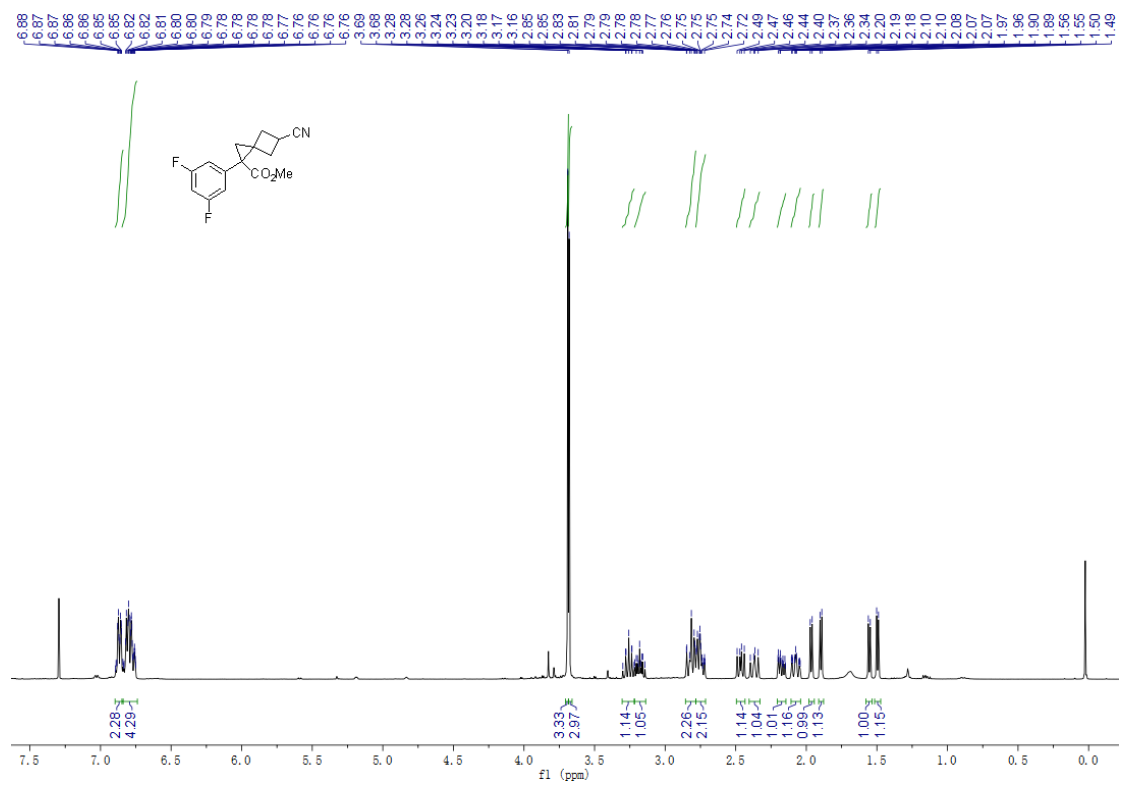



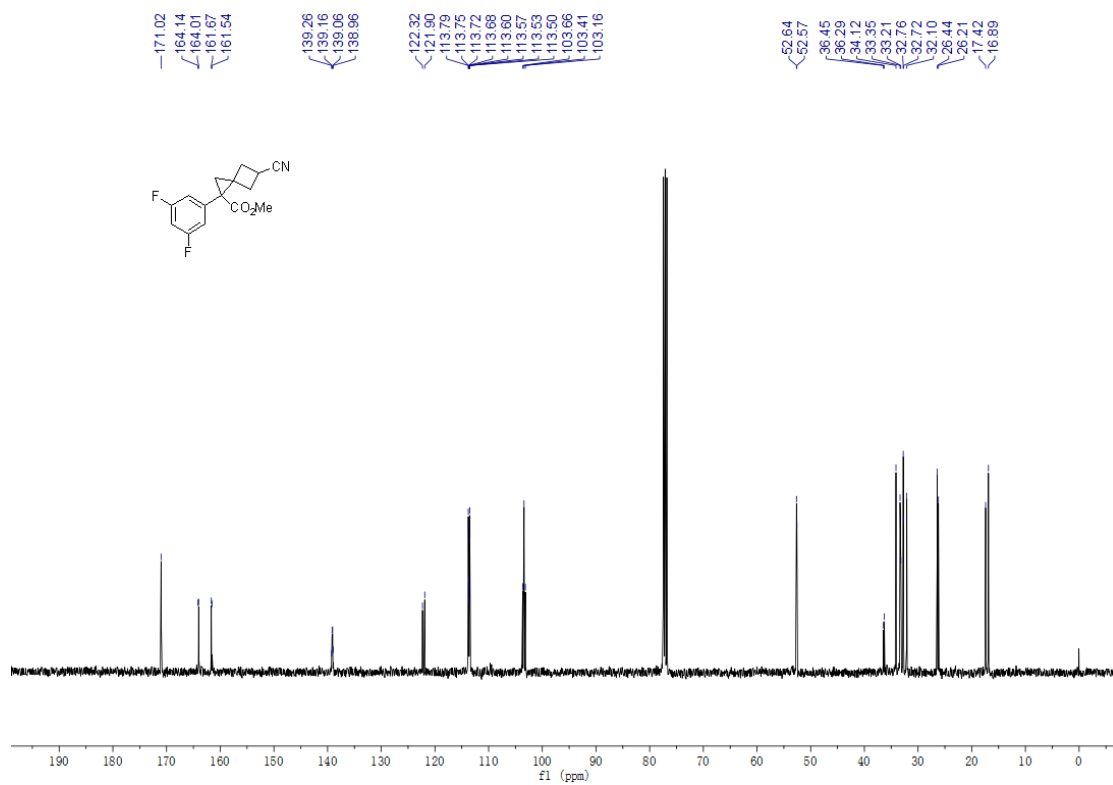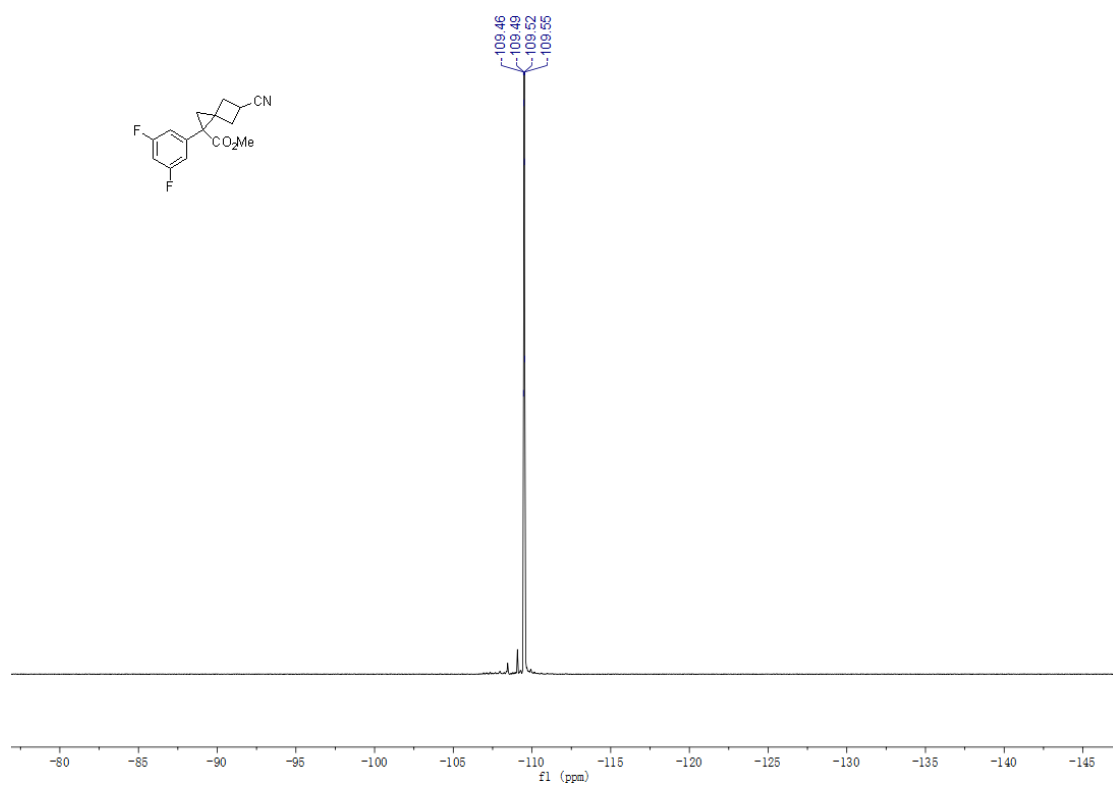

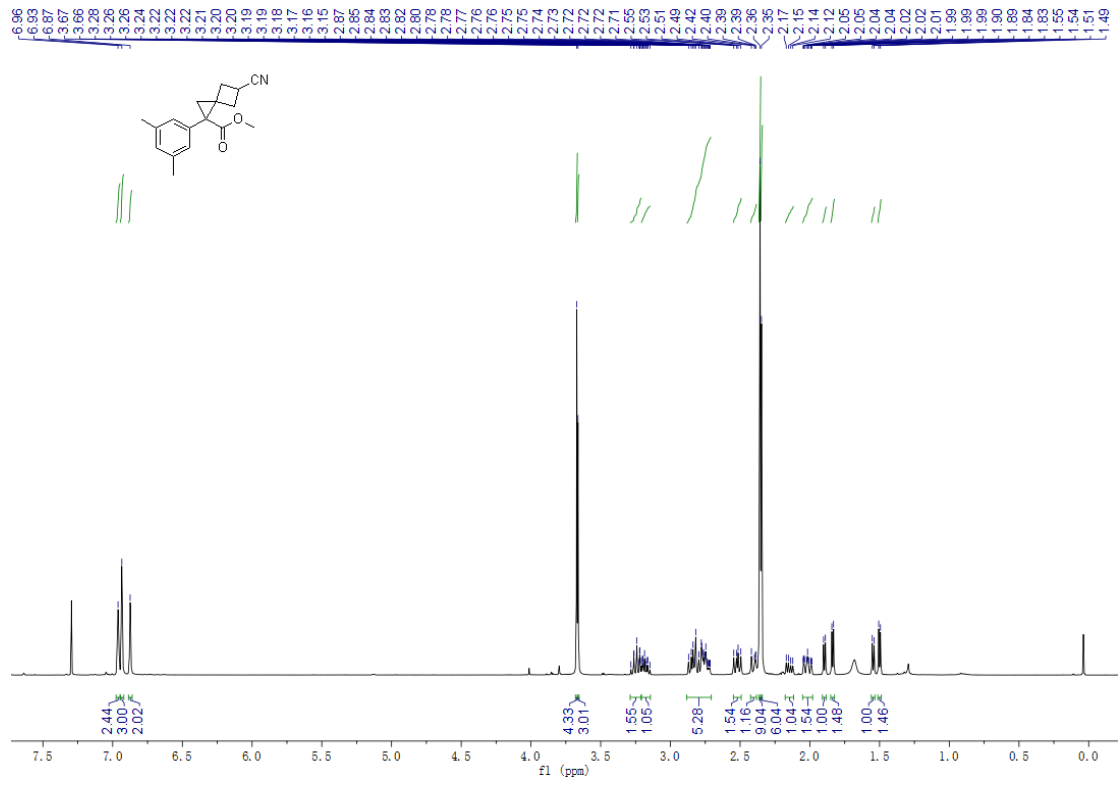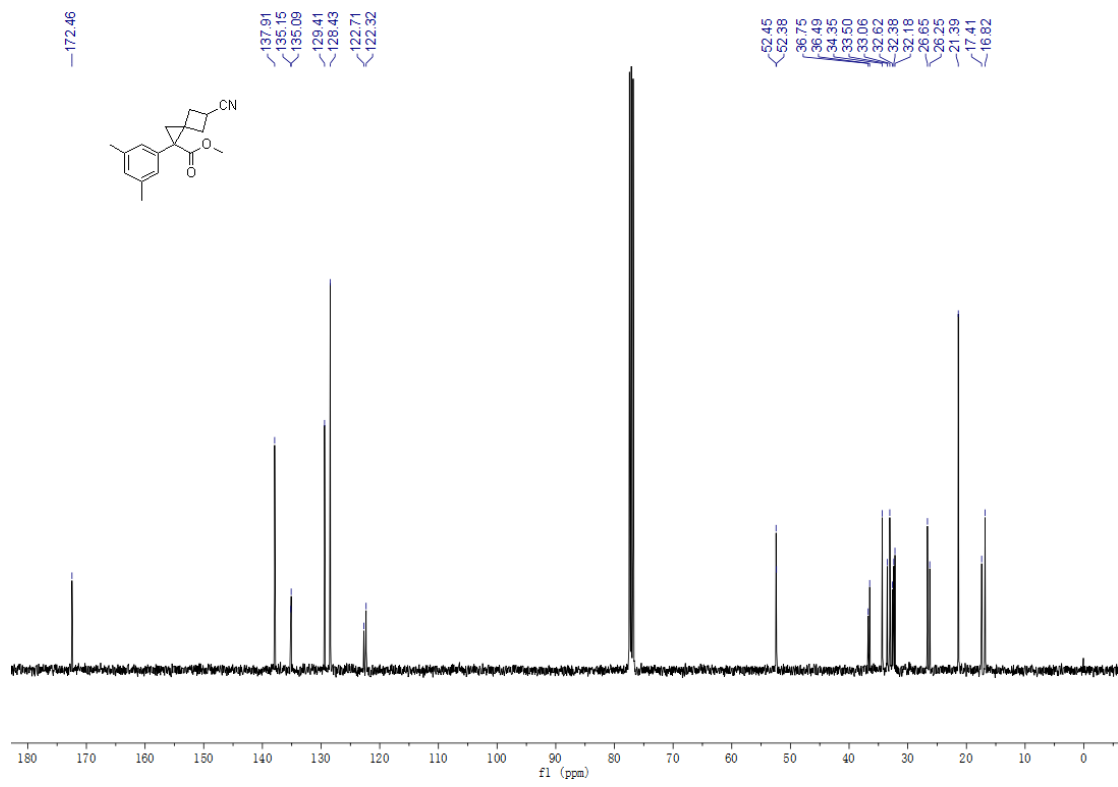

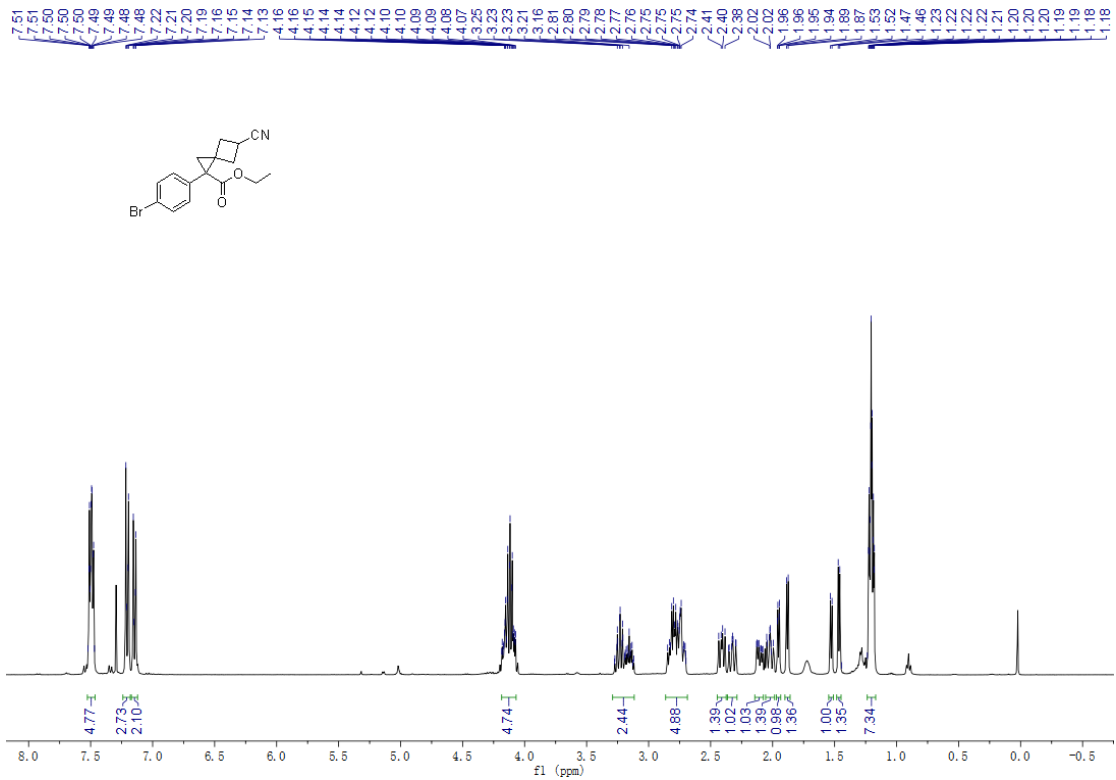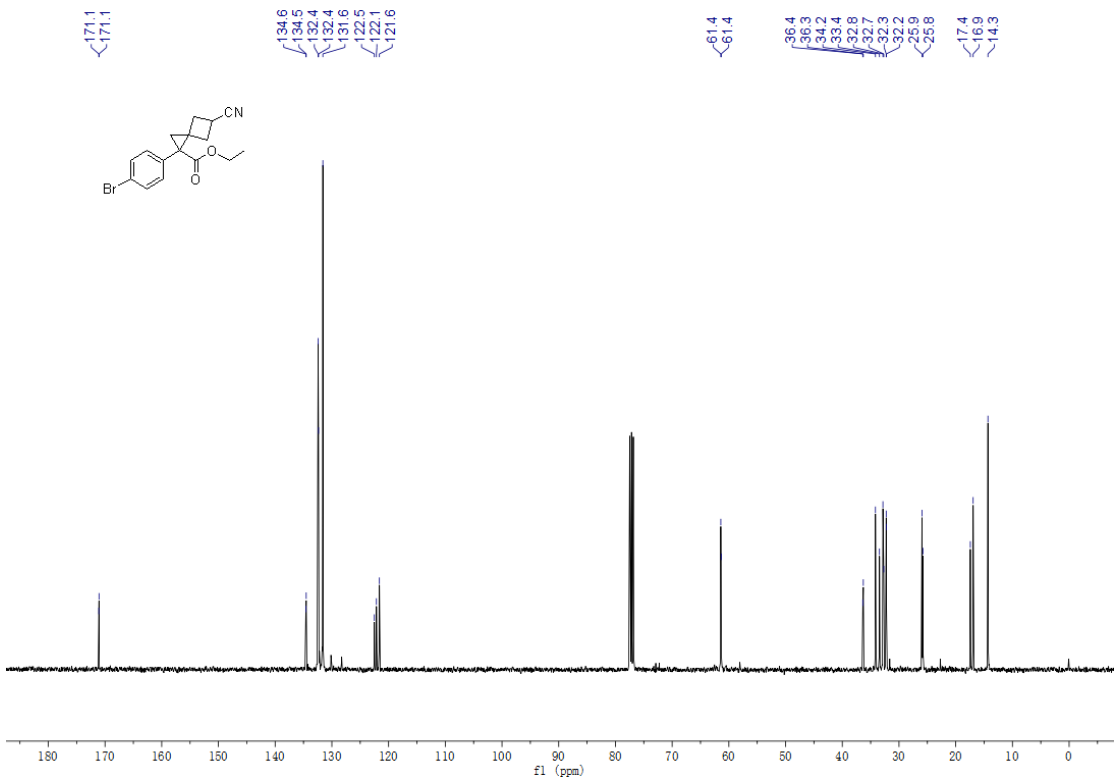

7.42  
7.40  
7.40  
7.39  
7.38  
7.37  
7.37  
7.36  
7.35  
7.35  
7.33  
7.32  
7.32  
7.30  
7.30  
7.29  
7.29  
7.28  
7.27  
7.27  
7.26  
7.25  
7.22  
7.22  
7.20  
7.10  
7.09  
7.08  
7.08  
7.07  
4.40  
4.39  
4.38  
4.37  
4.36  
4.25  
4.24  
4.24  
4.22  
4.22  
4.21  
4.21  
3.21  
3.19  
3.19  
2.90  
2.89  
2.88  
2.88  
2.87  
2.87  
2.86  
2.71  
2.69  
2.67  
2.64  
2.63  
2.62  
2.61  
2.47  
2.45  
2.00  
1.88  
1.83  
1.82  
1.53  
1.51  
1.50  
1.48

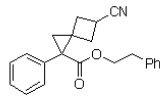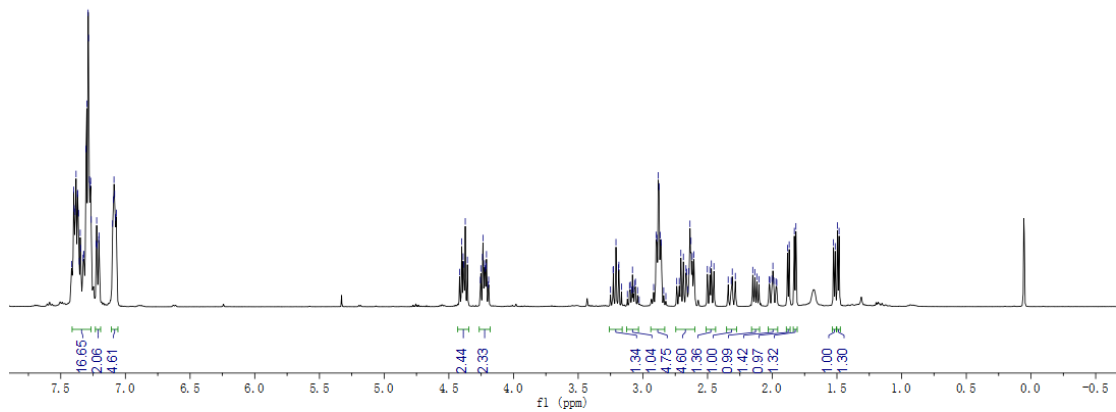

171.6  
171.5

137.9  
137.8  
136.4  
136.3  
130.8  
129.1  
128.5  
128.5  
128.4  
127.6  
127.5  
126.6  
122.6  
122.2

65.7  
65.6

37.0  
36.7  
35.1  
34.0  
33.9  
32.9  
32.7  
32.2  
32.2  
26.4  
25.8

17.4  
16.8

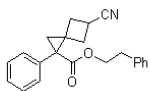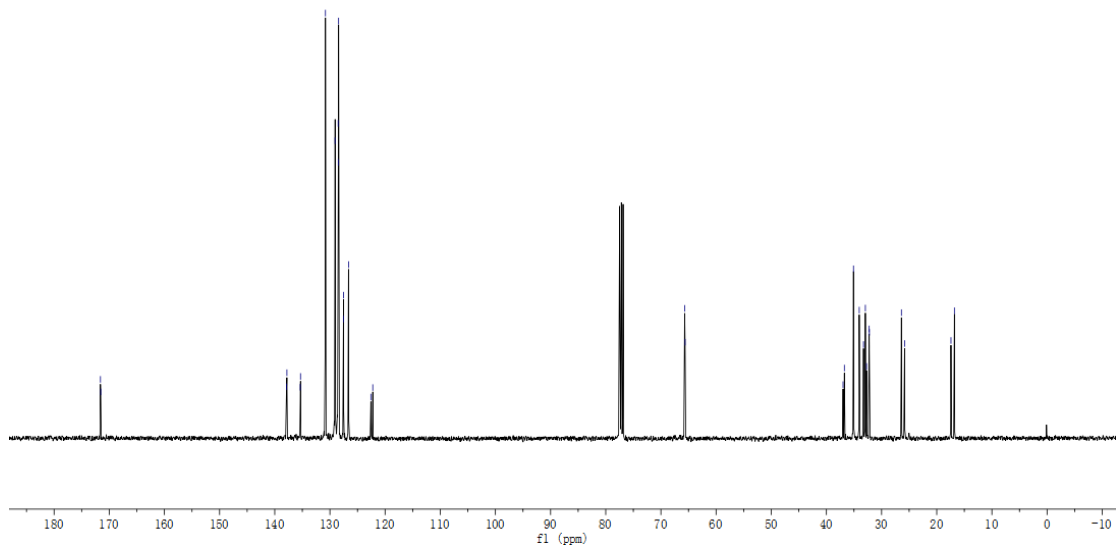



7.37  
7.36  
7.35  
7.34  
7.34  
7.32  
7.31  
7.30  
7.28  
7.27  
7.25  
7.24  
7.23  
7.23  
7.22  
5.69  
5.65  
5.07  
5.06  
5.06  
5.04  
5.04  
5.04  
5.03  
5.03  
5.03  
5.02  
5.01  
4.20  
4.19  
4.18  
4.17  
4.15  
4.07  
4.05  
4.04  
4.03  
4.02  
3.21  
3.19  
3.14  
2.81  
2.80  
2.79  
2.75  
2.75  
2.48  
2.45  
2.43  
2.33  
2.32  
2.31  
2.31  
2.30  
2.28  
1.99  
1.91  
1.90  
1.85  
1.84  
1.54  
1.50  
1.49

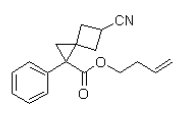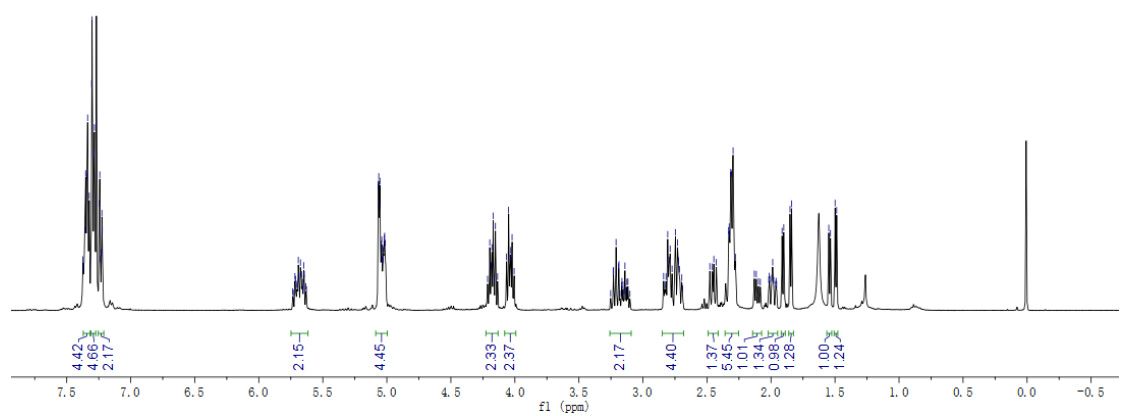

-171.6  
135.4  
135.3  
134.0  
133.9  
130.7  
128.4  
127.5  
127.5  
122.6  
122.2  
117.5  
117.4  
64.2  
64.2  
37.0  
36.8  
34.3  
33.5  
33.2  
32.9  
32.7  
32.3  
32.2  
25.1  
25.7  
17.4  
16.9

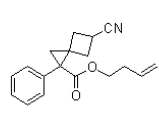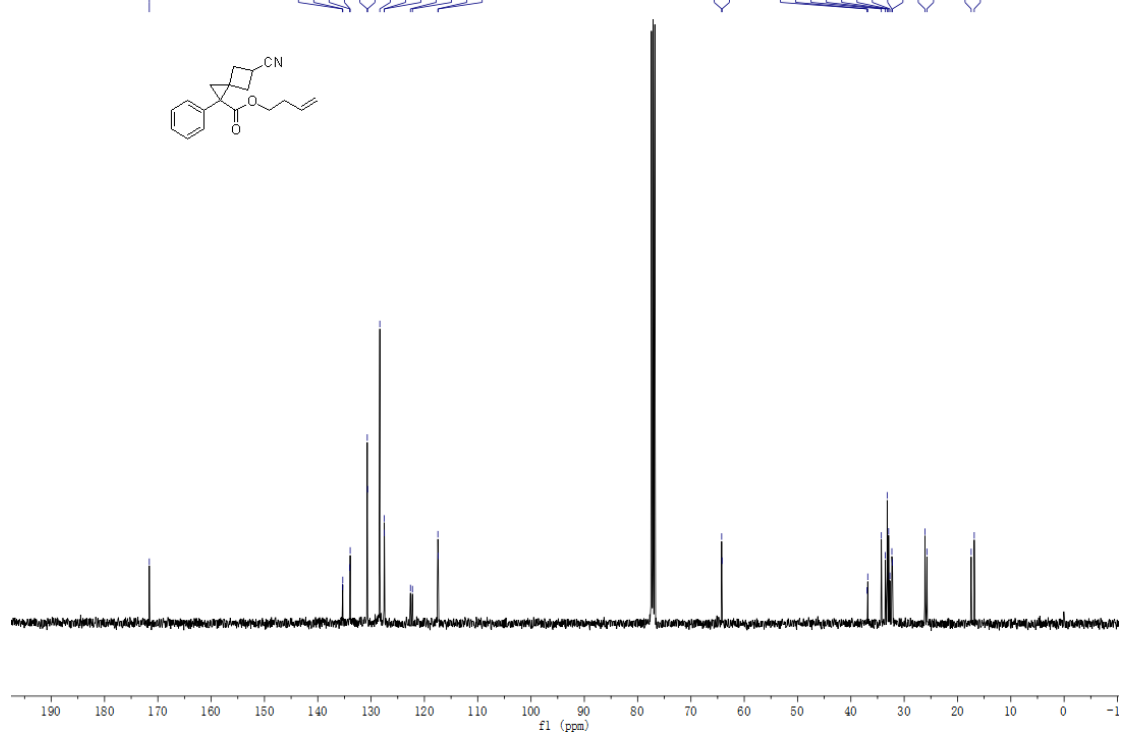

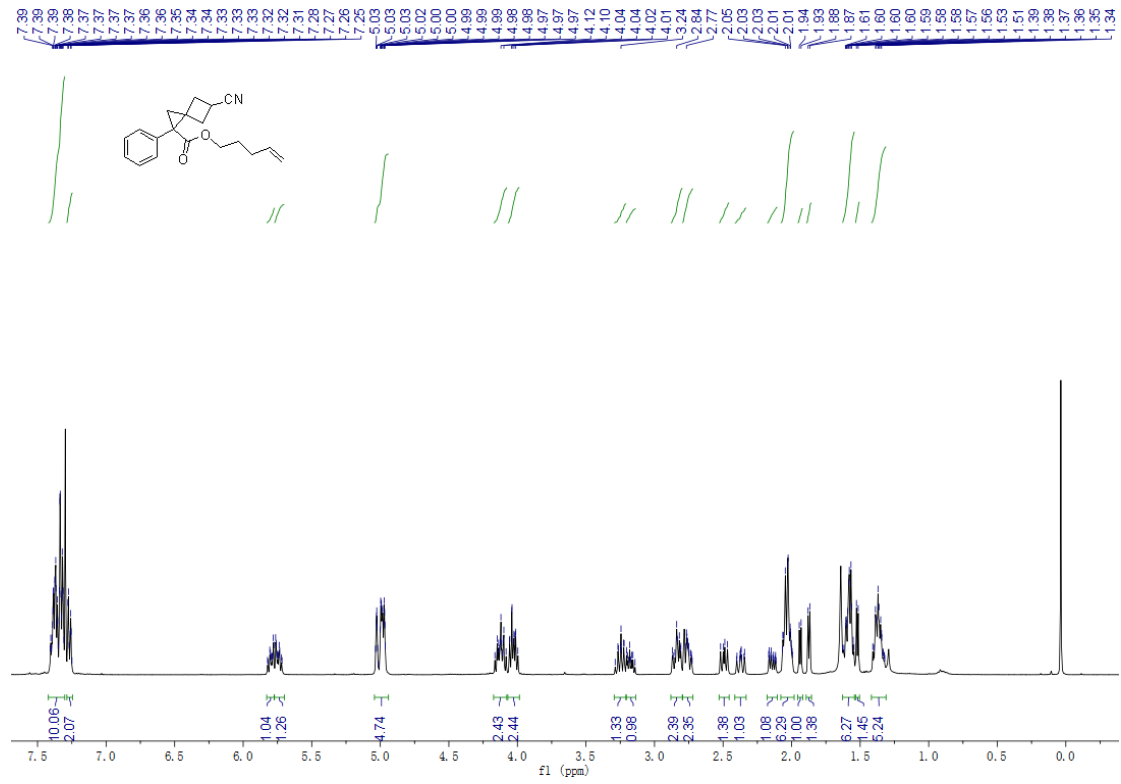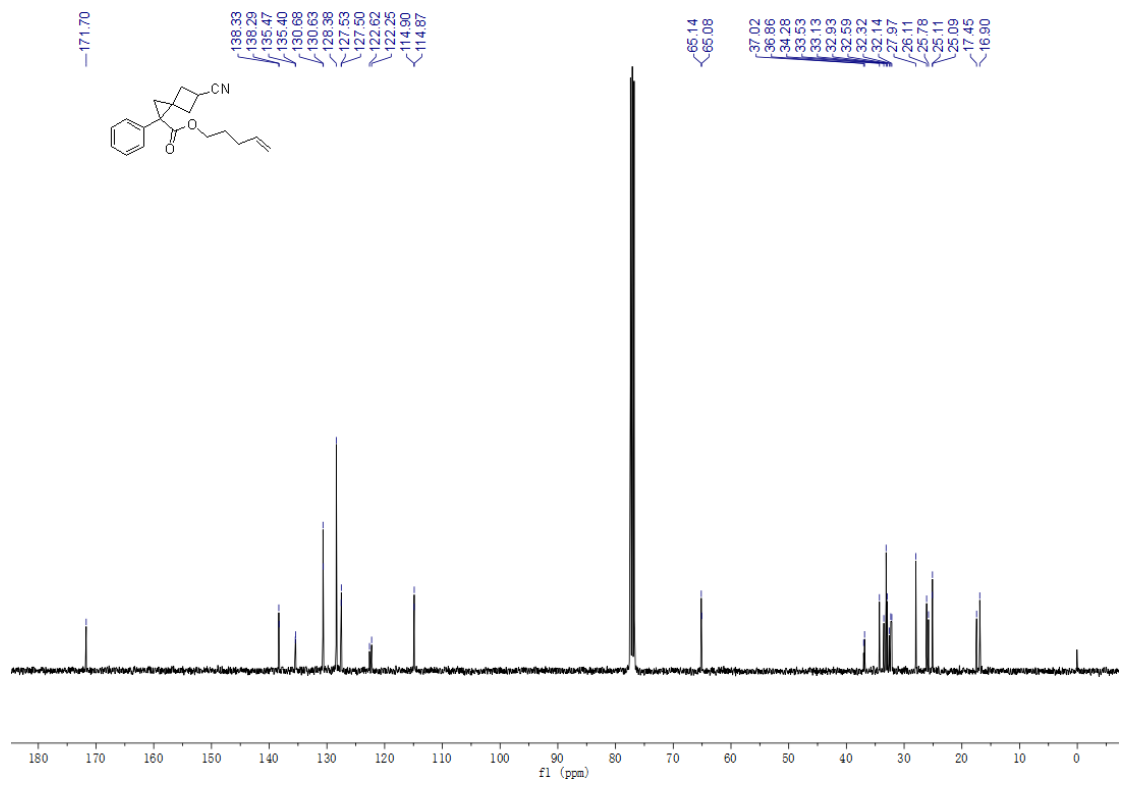

Supplement: d5ob00055f1.pdf [file d5ob00055f1.pdf]
